# Supplementary material for: Tropical tropospheric ozone distribution and trends from in situ and satellite data
Source: Copernicus journal article supplement (doi:10.5194/egusphere-2023-3095), 2024-01-22
Supplement: Supplementary file 1 [file egusphere-2023-3095-supplement.pdf]

## Supplementary Material

### Section S1. Sampling sensitivity test for in-situ measurements

Even though high temporal and spatial variability in ozone is well recognized, the positive impact of abundant sample sizes on detectability of trends is often under-appreciated. In terms of detecting trends in the free troposphere several previous studies concluded that a sampling frequency of once per week generally fails to produce accurate monthly mean and trend values (Logan, 1999; Saunio et al., 2012; Chang et al., 2020).

Since the in-situ sampling scheme is infrequent and sporadic at most locations in this study, we use the IAGOS dataset collected above Africa which has the highest measurement density (more than 30 profiles in some individual months) to explore the impact of sample size on trend detection in the tropics. In order to provide a baseline reference at northern mid-latitudes, we also analyze the IAGOS data collected above Frankfurt, Germany. Table S2 provides monthly sample sizes from Africa and Frankfurt. Even though Africa has the most abundant IAGOS data in the tropics, the overall sample sizes are still small compared to Frankfurt. The following analysis focuses on observations in the free troposphere (700-300 hPa).

We compute mean absolute percentage error (MAPE) between the ozone trend inferred from the complete data record and from an ensemble of trend estimates for randomly subsampled data sets. As in Chang et al. (2020), trend estimates are defined as accurate once MAPE falls below 5% with increasing sampling frequency  $r$ . Table S3 provides the MAPE obtained from 1000 random subsamples composed of a fixed number of  $r$  profiles per month. The sampling strategy can be summarized as follows: if a given month has  $n$  profiles and the requested monthly sampling frequency is  $r$ , then 1) if  $n \leq r$ , we select all the profiles, this is fixed in each iteration; 2) if  $n > r$ , we select  $r$  profiles randomly in each iteration. From the table we see that 19 profiles per month are required to produce an accurate trend estimate over Frankfurt, which is consistent with Chang et al. (2020). However, over Africa, the decrease of the trend MAPE is slow and MAPE remains high even when the considered sampling frequency is increased because there is a sufficient number of IAGOS profiles ( $n > r$ ) for just a small fraction of individual months.

The above finding is limited by the fact that we cannot meet the predetermined criterion for most cases in Africa (and the 5% criterion cannot be met). To determine the threshold for minimum sampling frequency for basic trend detection in the tropics, we further investigate the relationship between the magnitude of trends and the sampling frequency. In this case, basic trend detection refers to enough profiles to determine if there is a trend at a 2-sigma level, based on either the interquartile range (i.e. the 75% percentile) or tail (i.e. the worst-case scenario) of the sampling distribution, but it is not ideal for an accurate trend quantification. Figure S1 shows the distribution of median trends for a sampling frequency of 2, 4, 6, 8, 10 and 12 profiles a month, from 800 to 300 hPa with a 50 hPa vertical resolution. We can see the range of sampled trends becomes smaller when the sampling frequency is increased. Figures S2 and S3 show how the signal-to-noise ratios (i.e the ratio between the trend value and its uncertainty) of sampled

42 trends vary with different sampling frequencies at 800 to 300 hPa. These figures reveal many  
43 considerations regarding the relationship between sampling frequency and the magnitude of  
44 trends:

- 45 1. If the magnitude of the trend is strong (e.g.  $> 3 \text{ nmol mol}^{-1}/\text{decade}$  at 800 hPa), the trend  
46 can be detected at a low sampling frequency: 2 and 6 profiles per month are required for  
47 basic trend detection in 75% samples and the worst-case scenario (i.e. even for the worst  
48 case, the trend can be detected), respectively.
- 49 2. If the magnitude of the trend is moderate (e. g. between 1 and 2  $\text{nmol mol}^{-1}/\text{decade}$  at 600  
50 hPa):  
51 7 and 15 profiles per month are required for basic trend detection in 75% samples and the  
52 worst-case scenario, respectively.
- 53 3. If the trend is weak (e.g. around 1  $\text{nmol mol}^{-1}/\text{decade}$  at 700 hPa), a high sampling  
54 frequency is required to detect the weak signal: 14 profiles per month are required for  
55 basic trend detection in 75% samples, and the worst-case scenario cannot be prevented in  
56 this analysis.
- 57 4. For pressure surfaces with weak and highly uncertain trends (e.g. 350 and 500 hPa,  
58 Figure S1), the same conclusion can be generally drawn at either low or high sampling  
59 rates.

60  
61 Based on the above discussion, a typical sampling frequency of once per week is only sufficient  
62 for detection of very large trends (e.g.  $> |3| \text{ nmol mol}^{-1}/\text{decade}$ ), which are not common in the  
63 free troposphere. We also conclude that a sampling frequency of 7 profiles per month is  
64 sufficient for basic trend detection of tropospheric ozone in the tropics, when the magnitude of a  
65 trend is above  $|1| \text{ nmol mol}^{-1}/\text{decade}$ , but additional data are required for accurate quantification.  
66 It should be noted that natural variability also plays a role in trend detection, but its impact is  
67 expected to be more pronounced when we conduct sensitivity analyses on varying lengths of the  
68 data record, which is beyond the scope of the current analysis. Even though the influence  
69 between natural variability and sampling frequency is typically inseparable, by focusing on the  
70 same data set and same data length, the impact of natural variability should be weak on this  
71 sensitivity analysis. In monitoring long-term changes, the first problem is to detect a trend (as we  
72 investigated in this analysis). Once the presence of a trend is established, any additional  
73 information will help us to improve the accuracy and precision of trend detection.

74

## 75 **Section S2. The OMI/MLS measurements and drift corrections**

76

77 The Ozone Monitoring Instrument (OMI) and Microwave Limb Sounder (MLS) are two of four  
78 instruments on board the Aura spacecraft which is flown in a sun-synchronous polar orbit at 705  
79 km altitude with a  $98.2^\circ$  inclination. The Aura spacecraft was launched 15 July 2004 and has an  
80 equatorial crossing time of about 1:45 pm (ascending node). Both OMI and MLS instruments  
81 are still providing ozone measurements as of late 2023 which has yielded a nearly 20-year record  
82 of tropospheric ozone for evaluating global trends and other applications. In this study we focus  
83 on the 2004-2019 time period.

84

85 OMI/MLS tropospheric column ozone (TCO) is derived using the residual technique of Fishman  
86 et al. (1990). Fishman et al. (1990) originally subtracted Stratospheric Aerosols and Gas  
87 Experiment (SAGE) stratospheric column ozone (SCO) from Total Ozone Mapping  
88 Spectrometer (TOMS) total ozone measurements. We apply the same approach where Aura  
89 MLS SCO is subtracted from coincident Aura OMI total column ozone to derive TCO. The  
90 OMI/MLS algorithm is discussed in detail by Ziemke et al. (2006), And here we only summarize  
91 this method. First, along-track measurements of daily MLS profile ozone are vertically  
92 integrated in pressure from the top of the atmosphere down to the tropopause pressure to  
93 measure SCO. National Centers for Environmental Prediction (NCEP) re-analyses are  
94 incorporated for tropopause pressure using the standard World Meteorological Organization  
95 (WMO) 2K km<sup>-1</sup> lapse-rate definition. Next, a spatial 2D (Gaussian + longitudinal) interpolation  
96 is used to fill in between the MLS SCO orbital-track measurements. Daily TCO is then  
97 determined by subtracting these SCO fields from OMI total column ozone fields. Finally,  
98 OMI/MLS TCO daily maps are averaged monthly to produce the final TCO product.

99  
100 The OMI/MLS product has a high sampling frequency, as shown in Figure S4 and Figure S5.  
101 Prior to 2009 each 5° x 5° grid cell had 300-500 measurements per month in the tropics; this  
102 number decreased to 200-400 measurements per month after the row anomaly took effect  
103 (described below). The measurement uncertainty (one standard deviation) of the OMI/MLS  
104 product is approximately 7 DU for a daily retrieval at 1° x 1.25° resolution, or approximately 2  
105 DU at 5° x 5° resolution. It is reasonable to ask if this measurement uncertainty impacts the  
106 calculation of long-term trends from the OMI/MLS product. This question is addressed by the  
107 statistical field of error analysis (Grubbs, 1973; Taylor and Thompson, 1982; Moffat, 1988;  
108 Rabinovich, 2006; Buonaccorsi, 2010; Hughes and Hase, 2010). According to error analysis  
109 theory, if measurement uncertainty occurs randomly then the errors across a large sample size  
110 will cancel out and have little impact on the mean; in our case we are considering monthly mean  
111 values based on 200-400 OMI/MLS retrievals across a 5° x 5° grid cell. Given the very large  
112 sample size of the 5° x 5° OMI/MLS product the errors associated with measurement uncertainty  
113 cancel out and have little impact on the mean, and therefore little impact on the trend. Figure S6  
114 below illustrates this concept using the ozonesondes above Debilt, The Netherlands (one profile  
115 per week), Uccle, Belgium (three profiles per week), and the IAGOS aircraft profiles above  
116 Europe (multiple profiles per day). All three data sets report clear positive trends for the period  
117 1994-2019 based on monthly means produced from all available profiles (Figure S6a). In the  
118 next step random errors of 10% (representing measurement uncertainty) are imposed on all  
119 profiles. Figure S6b shows that the uncertainty of the monthly means increases slightly at Debilt  
120 and Uccle, but the uncertainty is almost unchanged for the IAGOS ensemble (due to the far  
121 greater sampling rates); the trend values at all three locations are almost unchanged, with only  
122 very slight increases in the 95% confidence intervals and *p*-values. In the final step random  
123 errors of 20% are imposed on all profiles (Figure S6c). These errors produce greater uncertainty  
124 of the monthly means for all three records, but the impact is greatest at Debilt which has the  
125 lowest sampling rate. Even though the imposed errors are relatively high, the overall trend values  
126 remain almost unchanged. The uncertainty of the trend values increases at all three sites, but the  
127 *p*-values remain below 0.05, and the impact is least for the IAGOS ensemble.

128  
129 The OMI/MLS TCO measurements over time have encountered instrument drift and other long-  
130 term quality issues including an OMI row-anomaly which became a large problem in late

131 January 2009 and which still continues (Torres et al., 2018, and references therein). The row  
132 anomaly was caused by a physical obstruction in the optical path of the OMI instrument,  
133 resulting in about 1/3 of pixel measurements being flagged for non-use beginning in January  
134 2009. Ziemke et al. (2019) discusses previous ozonesonde evaluation of offset and drift/row-  
135 anomaly corrections for the OMI/MLS TCO product. For that study corrections were made to  
136 include a mean +2 DU offset adjustment and a global  $-1.0 \text{ DU decade}^{-1}$  drift adjustment. We  
137 have recently made a further adjustment to the OMI/MLS TCO long record guided by  
138 comparisons with ozonesondes, ground-based Brewer/Dobson total ozone, and OMI convective-  
139 cloud differential (CCD) tropical TCO measurements. The sonde analyses indicated that an  
140 additional correction of about  $-0.6 \pm 0.38 \text{ DU decade}^{-1}$  over the long record be applied to all  
141 latitudes. The ozonesonde analysis includes measurements from the Southern Hemisphere  
142 Additional OZonesondes (SHADOZ) network (Thompson et al. 2017; Witte et al. 2017, 2018;  
143 Sterling et al., 2017) and measurements from the World Ozone and Ultraviolet Radiation Data  
144 Center (WOUDC) and Network for the Detection of Atmospheric Composition Change  
145 (NDACC) (deMazière et al., 2018). After combining this  $-0.6 \text{ DU decade}^{-1}$  correction with the  
146 previous  $-1 \text{ DU decade}^{-1}$  correction, the total drift correction is now equivalent to about -3 DU  
147 total change over the long record. This overall -3 DU drift correction coincides closely with  
148 calculated drift error for OMI total ozone of about +3 DU (+1%) from ground-based Brewer and  
149 Dobson total ozone comparisons (G. Labow, personal communication, 2023). As an additional  
150 cross-check for the new adjustment, we also included comparisons with OMI CCD tropical TCO  
151 (Ziemke et al., 1998); this suggested an additional drift correction of about  $-0.5 \pm 0.30 \text{ DU}$   
152  $\text{decade}^{-1}$  which is close to the ozonesonde comparisons. Thus, all three of these analysis methods  
153 for evaluating positive drift in OMI/MLS TCO agree.

154

### 155 **Section S3. Confidence scale for in situ trends**

156 This section provides a detailed description of the factors taken into consideration when  
157 assigning a confidence level to the in situ ozone trends reported in Table 1.

- 158 ● **Western Africa** (1994-2019): Data coverage is moderate (high sampling rate and  
159 moderate data gaps), combined with a low p-value associated with a strong trend,  
160 therefore **high confidence** is assigned to this region.
- 161 ● **India** (1994-2019): Data coverage is moderate (moderate data gaps and moderate  
162 sampling rates), combined with a low p-value associated with a strong trend. According  
163 to Table A1, high confidence should be assigned. However, since both the number of  
164 data gaps and sampling rates are on the fuzzy area around our criteria between low and  
165 moderate data availability, **moderate confidence** is assigned to this region.
- 166 ● **Samoa** (1994-2019): Data coverage is low (limited data gaps and low sampling rates),  
167 combined with a high p-value, so **very low confidence** is assigned to this region.
- 168 ● **Natal + Ascension Island** (1994-2019): Data coverage is low (limited data gaps but low  
169 sampling rates), combined with a low p-value, so **moderate confidence** is assigned to  
170 this region.

- 171 ● **Americas** (1994-2019): Data coverage is moderate (limited data gaps and moderate  
172 sampling rates), combined with a high p-value, so **low confidence** is assigned to this  
173 region.
- 174 ● **Southeast Asia** (1994-2019): Data coverage is moderate (moderate data gaps and  
175 moderate sampling rate), combined with a low p-value, so **high confidence** is assigned to  
176 this region.
- 177 ● **Malaysia/Indonesia** (1994-2019): Data coverage is low (moderate data gaps but low  
178 sampling rate), combined with a low p-value, so **moderate confidence** is assigned to this  
179 region.
- 180 ● **Western Africa, India and Samoa** (2004-2019): Data coverage is low (short time  
181 period), combined with a high p-value, so **very low confidence** is assigned in these  
182 regions.
- 183 ● **Natal + Ascension Island, Americas, Southeast Asia and Malaysia/Indonesia** (2004-  
184 2019): Data coverage is low (short time period), combined with a low p-value, so  
185 **moderate confidence** is assigned to these regions.  
186

187 **Section S4. Tables and Figures**

188 **Table S1.** Description of IAGOS fleet with the airlines, airports and number of profiles for the  
189 three focus time periods in this study (1995-2019 for long-term trends calculation, 2004-2019 for  
190 satellite evaluation, and 2014-2019 for present-day ozone distribution). All data above all  
191 airports listed in the table are used to quantify the distribution and trends of tropical tropospheric  
192 ozone as well as the evaluation of the satellite data.

| Region     | Airline     | Airport      | N profiles [1995-2019] | N profiles [2004-2019] | N profiles [2014-2019] |
|------------|-------------|--------------|------------------------|------------------------|------------------------|
| Americas   | Austrian    | Punta Cana   | 11                     | 0                      | 0                      |
|            | Lufthansa   | Bogota       | 560                    | 356                    | 347                    |
|            | Air France  |              |                        |                        |                        |
|            | Lufthansa   | Saint Martin | 89                     | 75                     | 32                     |
|            | Air France  |              |                        |                        |                        |
|            | Lufthansa   | Panama City  | 14                     | 14                     | 14                     |
|            | Iberia      | Guayaquil    | 4                      | 2                      | 2                      |
|            | Lufthansa   |              |                        |                        |                        |
|            | Lufthansa   | Lima         | 24                     | 0                      | 0                      |
|            | Air France  |              |                        |                        |                        |
|            | Lufthansa   | Maracay      | 1                      | 0                      | 0                      |
|            | Lufthansa   | San Juan     | 45                     | 0                      | 0                      |
|            | Lufthansa   | Antigua      | 31                     | 0                      | 0                      |
|            | Iberia      | San Jose     | 32                     | 32                     | 32                     |
|            | Lufthansa   |              |                        |                        |                        |
|            | Lufthansa   | Caracas      | 1214                   | 633                    | 85                     |
| Air France |             |              |                        |                        |                        |
| Lufthansa  | Mexico City | 52           | 3                      | 3                      |                        |

|  |             |               |     |     |     |
|--|-------------|---------------|-----|-----|-----|
|  | Air France  |               |     |     |     |
|  | Air France  | Cayenne       | 216 | 0   | 0   |
|  | Lufthansa   | Quito         | 72  | 1   | 1   |
|  | Air France  |               |     |     |     |
|  | Lufthansa   | Cali          | 2   | 0   | 0   |
|  | Air France  | Recife        | 25  | 0   | 0   |
|  | Lufthansa   | Santo Domingo | 2   | 0   | 0   |
|  | Lufthansa   | Porlamar      | 2   | 0   | 0   |
|  | Austrian    | Puerto Plata  | 12  | 0   | 0   |
|  |             |               |     |     |     |
|  | Lufthansa   | Malabo        | 182 | 182 | 182 |
|  | Air France  |               |     |     |     |
|  | Air France  | Yaounde       | 47  | 16  | 6   |
|  | Lufthansa   | Libreville    | 31  | 5   | 2   |
|  | Air France  |               |     |     |     |
|  | Lufthansa   | Abuja         | 376 | 355 | 351 |
|  | Air France  |               |     |     |     |
|  | Air France  | Ndjamena      | 25  | 25  | 23  |
|  | Air France  | Abidjan       | 233 | 38  | 35  |
|  | Lufthansa   |               |     |     |     |
|  | Sabena      |               |     |     |     |
|  | Air France  | Bamako        | 48  | 48  | 40  |
|  | Sabena      | Lagos         | 761 | 441 | 396 |
|  | Lufthansa   |               |     |     |     |
|  | Air France  |               |     |     |     |
|  | Air France  | Ouagadougou   | 122 | 113 | 74  |
|  | Lufthansa   | Tahoua        | 2   | 2   | 2   |
|  | Air France  | Djibouti      | 11  |     | 9   |
|  | Lufthansa   | Port Harcourt | 190 | 188 | 185 |
|  | Air France  |               |     |     |     |
|  | Air France  | Dakar         | 101 | 12  | 0   |
|  | Lufthansa   |               |     |     |     |
|  | Sabena      |               |     |     |     |
|  | Lufthansa   | Bamenda       | 1   | 1   | 1   |
|  | Sabena      | Entebbe       | 75  |     | 0   |
|  | Air France  | Nouakchott    | 91  | 62  | 58  |
|  | Lufthansa   | Khartoum      | 272 |     | 14  |
|  | Air France  | Accra         | 139 | 66  | 43  |
|  | Air Namibia |               |     |     |     |
|  | Lufthansa   |               |     |     |     |
|  | Air France  | Niamey        | 123 | 113 | 56  |
|  | Lufthansa   | Freetown      | 22  | 22  | 18  |

|                |                |              |     |     |     |
|----------------|----------------|--------------|-----|-----|-----|
|                | Air France     |              |     |     |     |
|                | Lufthansa      | Jeddah       | 95  |     | 95  |
|                | Sabena         | Douala       | 215 | 87  | 53  |
|                | Air France     |              |     |     |     |
|                | Sabena         | Lome         | 103 | 72  | 58  |
|                | Air France     |              |     |     |     |
|                | Sabena         | Cotonou      | 104 | 76  | 68  |
|                | Air France     |              |     |     |     |
|                | Air France     | Conakry      | 74  | 49  | 45  |
|                | Lufthansa      |              |     |     |     |
|                | Sabena         |              |     |     |     |
|                | Air France     | Pointe-noire | 28  | 28  | 28  |
|                | Sabena         | Kigali       | 64  |     | 0   |
|                | Air Namibia    | Brazzaville  | 40  | 31  | 29  |
|                | Air France     |              |     |     |     |
|                | Air France     | Kinshasa     | 102 | 19  | 17  |
|                | Sabena         |              |     |     |     |
|                | Lufthansa      | Luanda       | 254 | 210 | 89  |
|                | Air Namibia    |              |     |     |     |
|                | Air France     |              |     |     |     |
|                |                |              |     |     |     |
| India          | Cathay Pacific | Chennai      | 680 | 437 | 209 |
|                | Lufthansa      |              |     |     |     |
|                | Sabena         |              |     |     |     |
|                | Air France     | Bangalore    | 32  | 32  | 32  |
|                | Austrian       | Male         | 80  | 4   | 4   |
|                | LTU            |              |     |     |     |
|                | Lufthansa      |              |     |     |     |
|                | Austrian       | Colombo      | 58  | 19  | 19  |
|                | Lufthansa      |              |     |     |     |
|                | LTU            |              |     |     |     |
|                | Austrian       | Mumbai       | 177 | 56  | 28  |
|                | Cathay Pacific |              |     |     |     |
|                | Lufthansa      |              |     |     |     |
|                | Air France     |              |     |     |     |
| Cathay Pacific | Hyderabad      | 552          | 552 | 12  |     |
| Lufthansa      |                |              |     |     |     |
|                |                |              |     |     |     |
| Southeast Asia | Cathay Pacific | Cebu         | 18  | 18  | 18  |

|                    |                |                  |      |     |     |
|--------------------|----------------|------------------|------|-----|-----|
|                    | Lufthansa      | Bangkok          | 1535 | 895 | 598 |
|                    | Air France     |                  |      |     |     |
|                    | Austrian       |                  |      |     |     |
|                    | Cathay Pacific |                  |      |     |     |
|                    | China Airlines |                  |      |     |     |
|                    | China Airlines | Manila           | 191  | 191 | 146 |
|                    | Austrian       |                  |      |     |     |
|                    | Cathay Pacific |                  |      |     |     |
|                    | Lufthansa      |                  |      |     |     |
|                    | China Airlines | Ho Chi Minh City | 367  | 231 | 182 |
|                    | Cathay Pacific |                  |      |     |     |
|                    | Lufthansa      |                  |      |     |     |
|                    | Air France     |                  |      |     |     |
|                    | China Airlines | Guam             | 8    | 8   | 8   |
|                    | Cathay Pacific | Hong Kong        | 80   | 80  | 80  |
| China Airlines     |                |                  |      |     |     |
|                    |                |                  |      |     |     |
| Malaysia/Indonesia | Lufthansa      | Paya Lebar       | 1    | 0   | 0   |
|                    | Austrian       | Darwin           | 3    | 0   | 0   |
|                    | China Airlines | Jakarta          | 113  | 86  | 61  |
|                    | Cathay Pacific |                  |      |     |     |
|                    | Lufthansa      |                  |      |     |     |
|                    | Air France     |                  |      |     |     |
|                    | Cathay Pacific | Surabaya         | 18   | 18  | 18  |
|                    | China Airlines |                  |      |     |     |
|                    | China Airlines | Kuala Lumpur     | 208  | 192 | 139 |
|                    | Cathay Pacific |                  |      |     |     |
| China Airlines     | Denpasar       | 32               | 32   | 32  |     |



|  |                |           |     |     |    |
|--|----------------|-----------|-----|-----|----|
|  | Cathay Pacific |           |     |     |    |
|  | China Airlines | Singapore | 265 | 143 | 92 |
|  | Cathay Pacific |           |     |     |    |
|  | Lufthansa      |           |     |     |    |
|  | Air France     |           |     |     |    |

193

194

195

196

197

198

199

200 **Table S2.** Number of IAGOS profiles by year and month above Africa (left panel) and  
 201 Frankfurt, Germany (right panel).

|      | 1  | 2  | 3  | 4  | 5  | 6  | 7  | 8  | 9  | 10 | 11 | 12 |
|------|----|----|----|----|----|----|----|----|----|----|----|----|
| 1997 | 0  | 0  | 0  | 6  | 52 | 37 | 48 | 65 | 40 | 58 | 28 | 8  |
| 1998 | 9  | 23 | 9  | 2  | 4  | 2  | 4  | 2  | 24 | 6  | 8  | 10 |
| 1999 | 22 | 18 | 13 | 15 | 12 | 20 | 32 | 8  | 2  | 30 | 15 | 12 |
| 2000 | 22 | 10 | 20 | 44 | 38 | 18 | 54 | 40 | 16 | 36 | 23 | 6  |
| 2001 | 18 | 14 | 32 | 66 | 0  | 0  | 0  | 4  | 2  | 29 | 10 | 12 |
| 2002 | 20 | 45 | 37 | 0  | 0  | 0  | 2  | 0  | 1  | 18 | 8  | 2  |
| 2003 | 19 | 32 | 4  | 14 | 30 | 12 | 38 | 47 | 42 | 66 | 46 | 10 |
| 2004 | 34 | 18 | 22 | 0  | 2  | 13 | 20 | 4  | 2  | 32 | 0  | 0  |
| 2007 | 12 | 6  | 0  | 0  | 0  | 0  | 0  | 0  | 0  | 0  | 0  | 4  |
| 2008 | 6  | 2  | 4  | 2  | 2  | 0  | 2  | 2  | 2  | 2  | 0  | 2  |
| 2009 | 8  | 2  | 22 | 4  | 0  | 0  | 8  | 0  | 0  | 0  | 0  | 0  |
| 2010 | 0  | 3  | 0  | 0  | 0  | 0  | 0  | 0  | 0  | 5  | 0  | 2  |
| 2011 | 0  | 4  | 6  | 0  | 0  | 0  | 21 | 2  | 4  | 2  | 6  | 10 |
| 2012 | 0  | 6  | 4  | 7  | 0  | 0  | 14 | 2  | 17 | 32 | 30 | 54 |
| 2013 | 70 | 21 | 21 | 8  | 0  | 33 | 34 | 6  | 2  | 29 | 32 | 36 |
| 2014 | 34 | 9  | 0  | 13 | 4  | 16 | 0  | 0  | 0  | 0  | 0  | 0  |
| 2015 | 0  | 4  | 14 | 44 | 38 | 0  | 10 | 19 | 38 | 56 | 33 | 68 |
| 2016 | 55 | 61 | 49 | 37 | 42 | 42 | 57 | 36 | 33 | 16 | 23 | 44 |
| 2017 | 62 | 40 | 18 | 54 | 80 | 86 | 51 | 60 | 86 | 38 | 56 | 19 |
| 2018 | 4  | 15 | 96 | 51 | 52 | 64 | 49 | 7  | 5  | 0  | 0  | 16 |
| 2019 | 6  | 14 | 28 | 24 | 28 | 31 | 29 | 30 | 24 | 28 | 24 | 14 |

|      | 1   | 2   | 3   | 4   | 5   | 6   | 7   | 8   | 9   | 10  | 11  | 12  |
|------|-----|-----|-----|-----|-----|-----|-----|-----|-----|-----|-----|-----|
| 1994 | 0   | 0   | 0   | 0   | 0   | 0   | 0   | 62  | 101 | 96  | 98  | 116 |
| 1995 | 122 | 141 | 121 | 119 | 115 | 125 | 141 | 109 | 150 | 64  | 100 | 84  |
| 1996 | 139 | 123 | 39  | 123 | 153 | 128 | 121 | 158 | 101 | 102 | 145 | 103 |
| 1997 | 168 | 115 | 134 | 107 | 156 | 180 | 192 | 185 | 192 | 162 | 114 | 143 |
| 1998 | 185 | 146 | 158 | 137 | 165 | 126 | 121 | 187 | 181 | 160 | 141 | 143 |
| 1999 | 113 | 148 | 131 | 132 | 169 | 182 | 219 | 201 | 191 | 206 | 190 | 198 |
| 2000 | 177 | 163 | 172 | 218 | 209 | 167 | 196 | 168 | 151 | 155 | 135 | 131 |
| 2001 | 134 | 109 | 140 | 150 | 101 | 92  | 127 | 118 | 117 | 119 | 83  | 88  |
| 2002 | 68  | 109 | 104 | 46  | 45  | 13  | 74  | 96  | 117 | 126 | 130 | 57  |
| 2003 | 45  | 90  | 97  | 121 | 118 | 189 | 188 | 215 | 178 | 197 | 169 | 180 |
| 2004 | 158 | 128 | 136 | 112 | 108 | 172 | 212 | 184 | 111 | 126 | 58  | 142 |
| 2005 | 138 | 105 | 146 | 121 | 131 | 120 | 96  | 98  | 125 | 89  | 105 | 103 |
| 2006 | 71  | 68  | 73  | 70  | 78  | 78  | 129 | 83  | 109 | 117 | 113 | 116 |
| 2007 | 75  | 85  | 68  | 66  | 71  | 81  | 90  | 76  | 80  | 20  | 49  | 67  |
| 2008 | 80  | 67  | 56  | 29  | 69  | 78  | 54  | 70  | 64  | 70  | 88  | 115 |
| 2009 | 130 | 99  | 118 | 63  | 111 | 110 | 147 | 80  | 53  | 10  | 47  | 56  |
| 2010 | 9   | 46  | 6   | 2   | 4   | 4   | 4   | 4   | 15  | 40  | 49  | 54  |
| 2011 | 53  | 90  | 109 | 102 | 58  | 73  | 171 | 98  | 95  | 122 | 98  | 102 |
| 2012 | 16  | 63  | 85  | 138 | 38  | 13  | 110 | 86  | 104 | 79  | 109 | 145 |
| 2013 | 159 | 91  | 83  | 84  | 104 | 139 | 125 | 94  | 86  | 77  | 90  | 134 |
| 2014 | 109 | 85  | 71  | 126 | 103 | 132 | 104 | 63  | 36  | 55  | 36  | 10  |
| 2015 | 58  | 31  | 35  | 92  | 86  | 58  | 102 | 124 | 90  | 114 | 63  | 61  |
| 2016 | 64  | 74  | 52  | 95  | 148 | 111 | 150 | 145 | 120 | 89  | 85  | 135 |
| 2017 | 119 | 94  | 50  | 125 | 134 | 143 | 139 | 147 | 125 | 101 | 114 | 52  |
| 2018 | 46  | 23  | 66  | 62  | 78  | 89  | 85  | 59  | 42  | 51  | 0   | 47  |
| 2019 | 41  | 45  | 49  | 59  | 70  | 105 | 83  | 53  | 20  | 46  | 44  | 34  |

202

203

204

205 **Table S3.** The mean absolute percentage error (MAPE) values between the trend value derived  
 206 from the full dataset and sampled trends are reported, based on quantile regression and free  
 207 tropospheric observations (700-300 hPa) above Frankfurt and Africa. Sampled trends are  
 208 generated by one thousand random samples for each of a predetermined number of profiles per  
 209 month.

|                       |      |      |      |      |      |      |      |      |      |      |
|-----------------------|------|------|------|------|------|------|------|------|------|------|
| #profile<br>per month | 1    | 2    | 3    | 4    | 5    | 6    | 7    | 8    | 9    | 10   |
| Frankfu               | 69.1 | 39.3 | 28.1 | 18.0 | 16.7 | 15.3 | 14.3 | 12.4 | 11.7 | 9.1  |
| Africa                | 93.9 | 85.0 | 79.6 | 71.9 | 64.3 | 55.2 | 54.9 | 53.1 | 50.1 | 48.9 |
| #profile<br>per month | 11   | 12   | 13   | 14   | 15   | 16   | 17   | 18   | 19   | 20   |
| Frankfu               | 9.0  | 8.7  | 8.3  | 7.6  | 7.2  | 5.9  | 5.6  | 5.2  | 4.8  | 3.9  |
| Africa                | 47.8 | 46.4 | 42.3 | 40.5 | 38.9 | 34.0 | 31.6 | 26.4 | 26.0 | 23.2 |

210

211

212 **Table S4. Summary of the TCO trends in nmol mol<sup>-1</sup> decade<sup>-1</sup> from IAGOS**

213 The sampling column reports three numbers for the in situ data: i) the number on the top refers to  
 214 the average number of profiles per months taking into account all the months with profiles, ii)  
 215 the number in the middle refers to the percentage of months with data for the studied time-period  
 216 (1994-2019 or 2004-2019), iii) the number in the bottom refers to the total number of profiles for  
 217 the studied time period (1994-2019 or 2004-2019). We provide these numbers for a reference,  
 218 but, for these three IAGOS regions, our final conclusions are based on the confidence scale for  
 219 the fused (IAGOS + SHADOZ) results (See Table 1 in the main manuscript).

220

|       |                        | 1994-2019                                                      |             |                       | 2004-2019                                                      |             |                       |
|-------|------------------------|----------------------------------------------------------------|-------------|-----------------------|----------------------------------------------------------------|-------------|-----------------------|
|       |                        | Trends±2σ<br>(nmol mol <sup>-1</sup><br>decade <sup>-1</sup> ) | p-<br>value | Sampli<br>ng          | Trends±2σ<br>(nmol mol <sup>-1</sup><br>decade <sup>-1</sup> ) | p-<br>value | Sampli<br>ng          |
| IAGOS | Americas               | 2.07±0.51                                                      | <0.01       | 10.8<br>71.5%<br>2403 | 0.64±1.21                                                      | 0.29        | 9.8<br>66.1%<br>1248  |
|       | Southeast Asia         | 4.66±0.46                                                      | <0.01       | 15.3<br>62.7%<br>2194 | 4.07±1.60                                                      | <0.01       | 16.2<br>61.1%<br>1423 |
|       | Malaysia/Indon<br>esia | 6.44±1.13                                                      | <0.01       | 8.0<br>44.4%<br>636   | 8.62±2.29                                                      | <0.01       | 9.3<br>47.2%<br>475   |

221

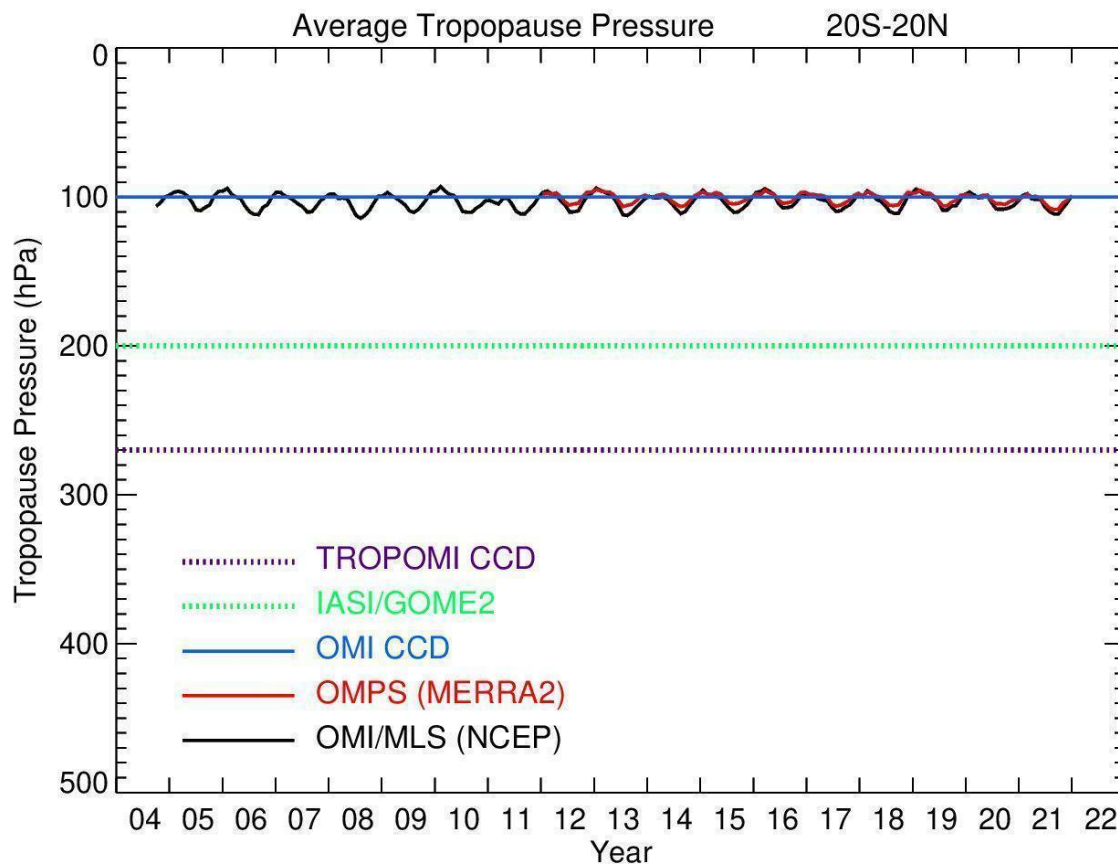

222

223 **Figure S1.** Time series of the monthly mean of the tropopause pressure level used to define the  
 224 tropical tropospheric column ozone (TTCO) with satellite data.

225

226

227

228

229

230

231

232

## Sampling distribution of median trends (IAGOS Africa)

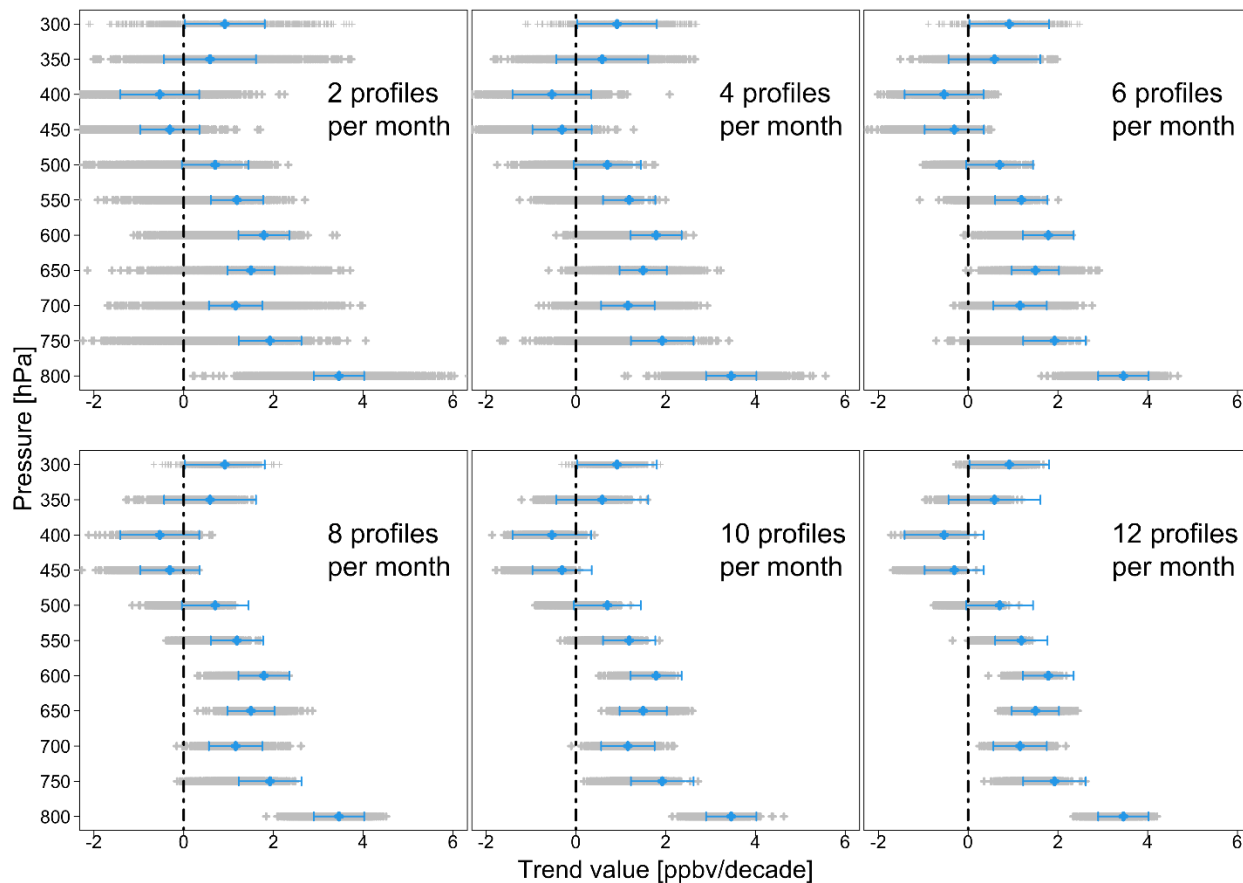

234

235 **Figure S2.** Sampling distributions of trends for a sampling frequency of 2 to 12 profile-per-  
 236 month above Africa. The estimation is based on quantile regression. Blue crosses are the median  
 237 trend estimates derived from all available data, the horizontal blue bars indicate the 95%  
 238 confidence interval of the trend with full sampling, each gray cross represents the estimate  
 239 produced by a random sampling from 1000 iterations.

240

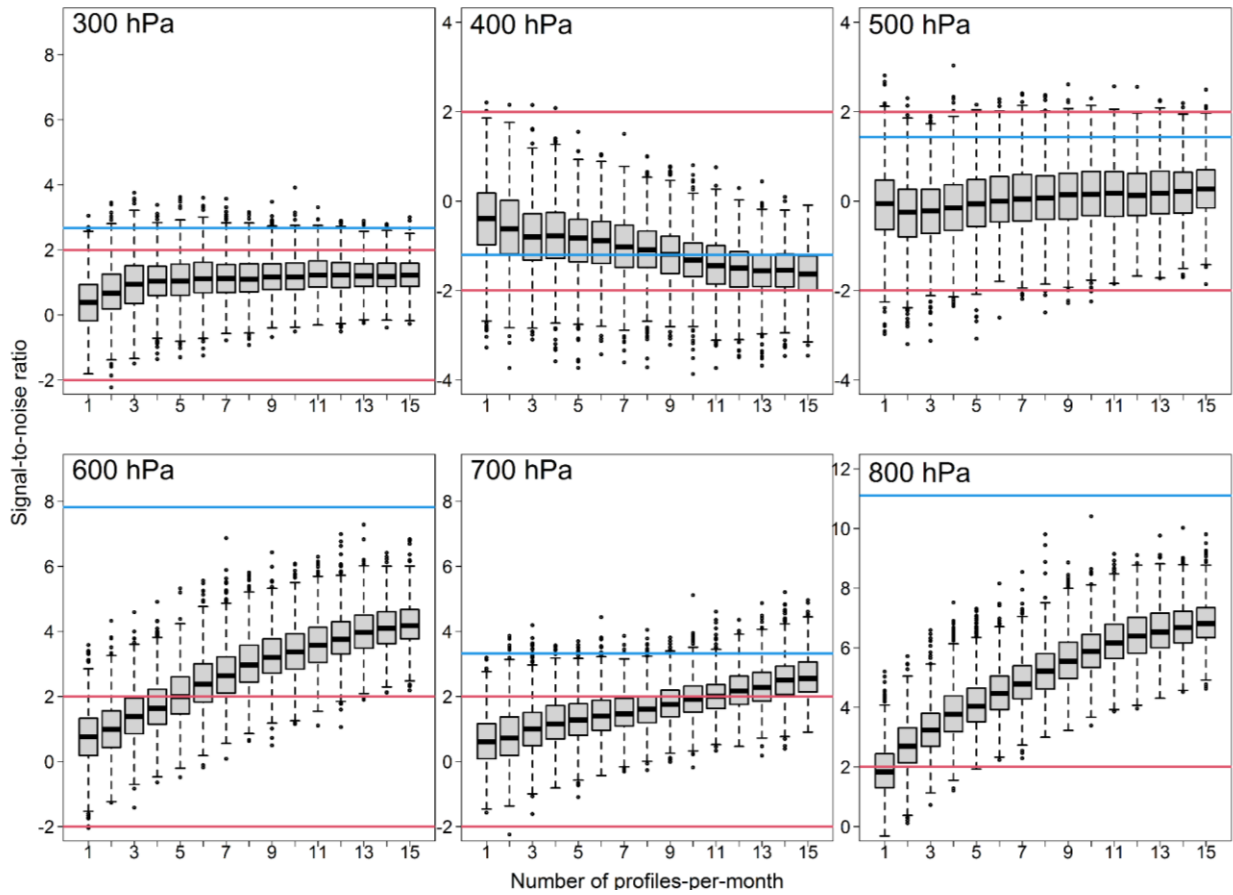

241

242 **Figure S3.** Sampled signal-to-noise ratios of the ozone trends. The ratios vary with different  
 243 sampling frequencies at 800 to 300 hPa above Africa. Red lines (at signal-to-noise ratios of 2 and  
 244 -2) represent the conventional trend detection threshold (i.e. 95% confidence level), and blue  
 245 lines represent the SNR derived from all available data.

246

247

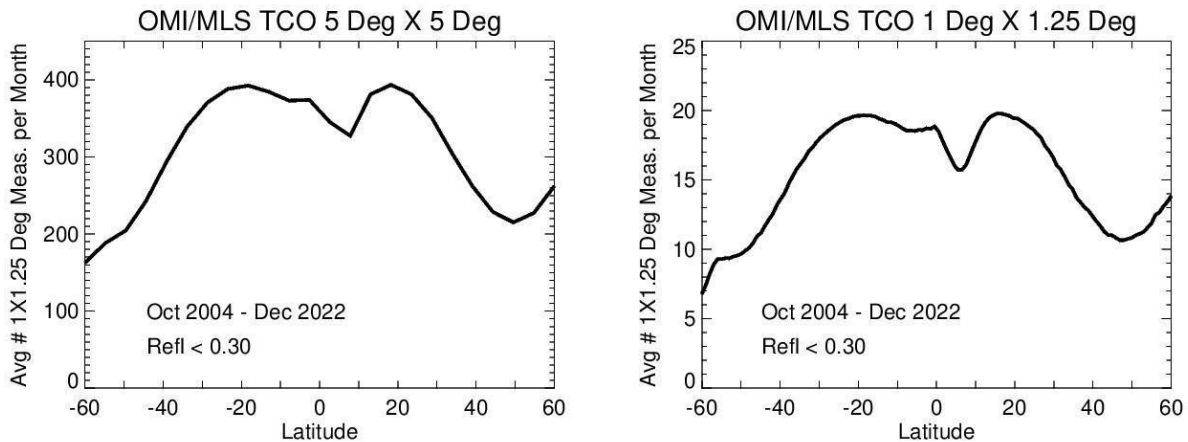

248

249 **Figure S4.** Number of  $1^\circ \times 1.25^\circ$  resolution OMI/MLS tropospheric column ozone  
250 measurements per month in a  $5^\circ \times 5^\circ$  grid cell (left panel) or a  $1^\circ \times 1.25^\circ$  grid cell (right panel), by  
251 latitude. The data have been cloud-filtered using a low reflectivity threshold of  $R < 0.30$ , and the  
252 results are averaged across October 2004 to December 2022.

253  
254  
255  
256

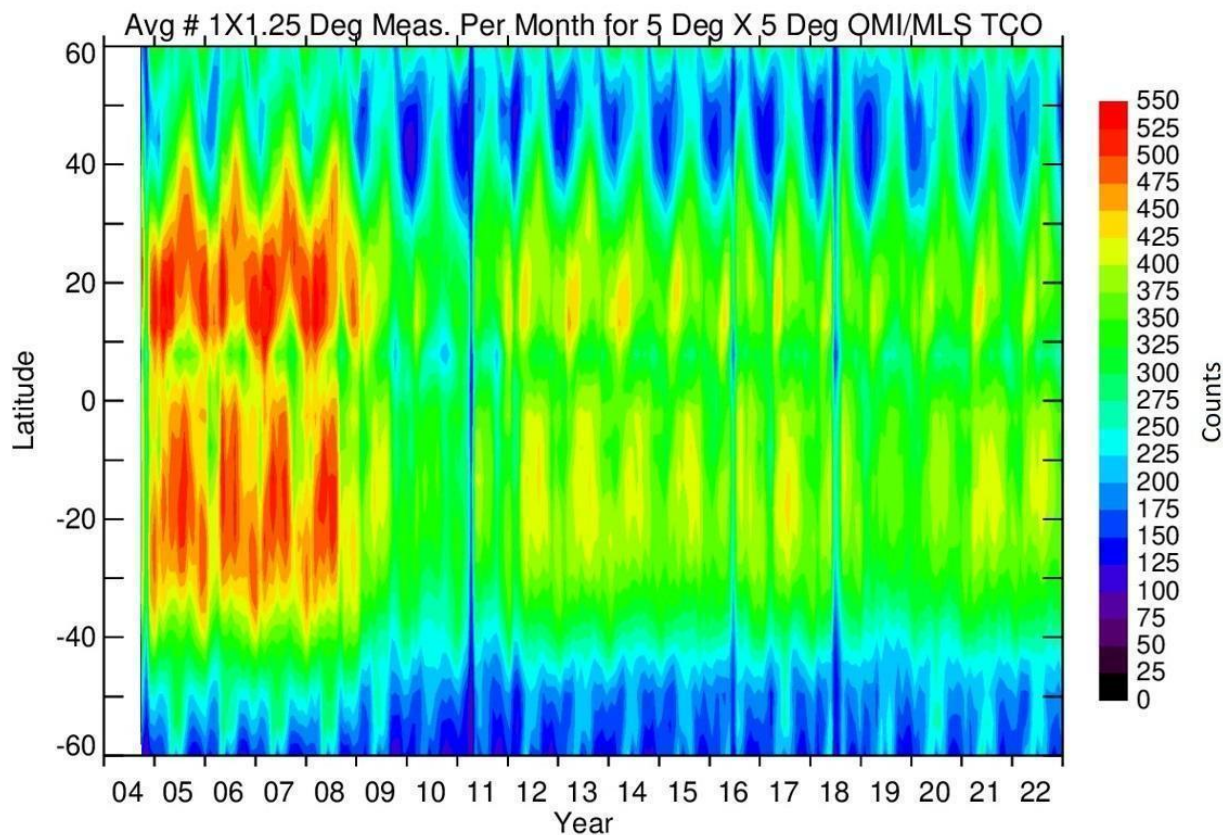

257  
258 **Figure S5.** Hovmoller plot of average number of daily  $1^\circ \times 1.25^\circ$  tropospheric column ozone  
259 (TCO) measurements per month within each  $5^\circ \times 5^\circ$  grid cell, following  $R < 0.30$  cloud filtering.  
260 Starting January 2009 there are fewer measurements due to the row anomaly problem

261



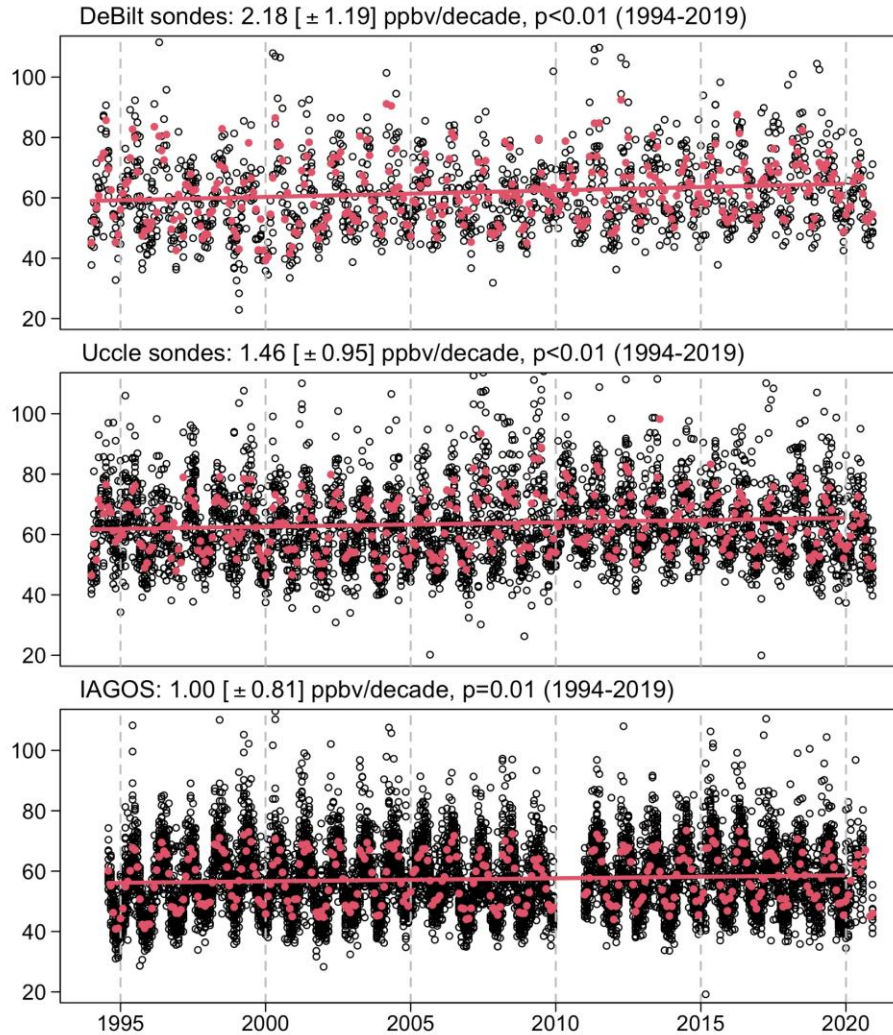

262

263 **Figure S6a.** Mid-tropospheric (700-300 hPa) ozone trends (1994-2019) at three European  
 264 locations: DeBilt, The Netherlands (top), Uccle, Belgium (center) and an ensemble of all IAGOS  
 265 profiles above Europe (bottom). Each black point represents a mid-tropospheric observation  
 266 (averaged over 700-300 hPa) from a single profile, while the red points represent monthly means  
 267 (under the assumption of no measurement uncertainty). Also shown are the linear trends for  
 268 1994-2019, with 95% confidence intervals and  $p$ -values.

269



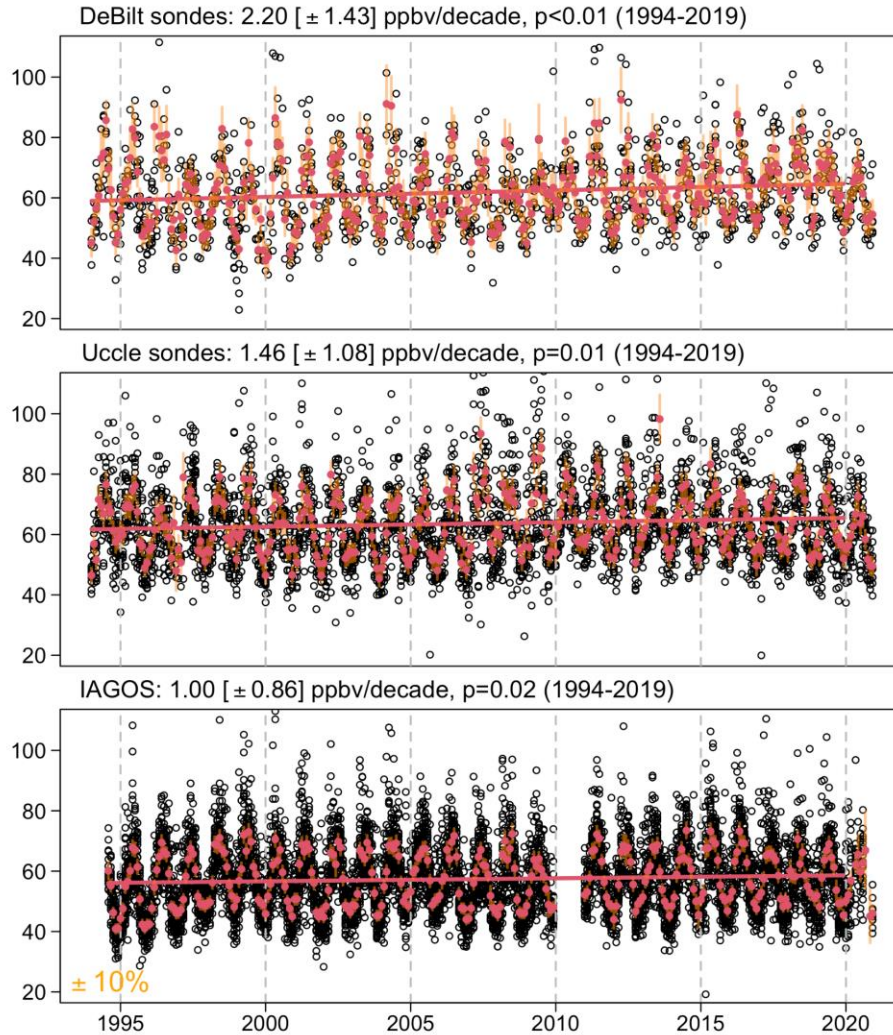

270

271 **Figure S6b.** As in Figure S6a, but with random noise of 10% imposed on each individual ozone  
 272 value (the noise value is randomly selected from a normal distribution with 0 mean and SD as  
 273  $y \cdot 0.10$  (e.g. for a desired uncertainty of  $\pm 10\%$ )). For each month, monthly means are produced  
 274 from the corresponding noise-added observations. This procedure is repeated 10,000 times, and  
 275 the 2.5<sup>th</sup> and 97.5<sup>th</sup> percentiles from the 10,000 noise-added monthly means indicate the 95%  
 276 confidence interval of the means (shown with the orange bars on each monthly mean). Finally,  
 277 10,000 trend values are produced, and the mean and standard deviation become the final trend  
 278 and sigma uncertainty reported in each panel of the figure.

279

280

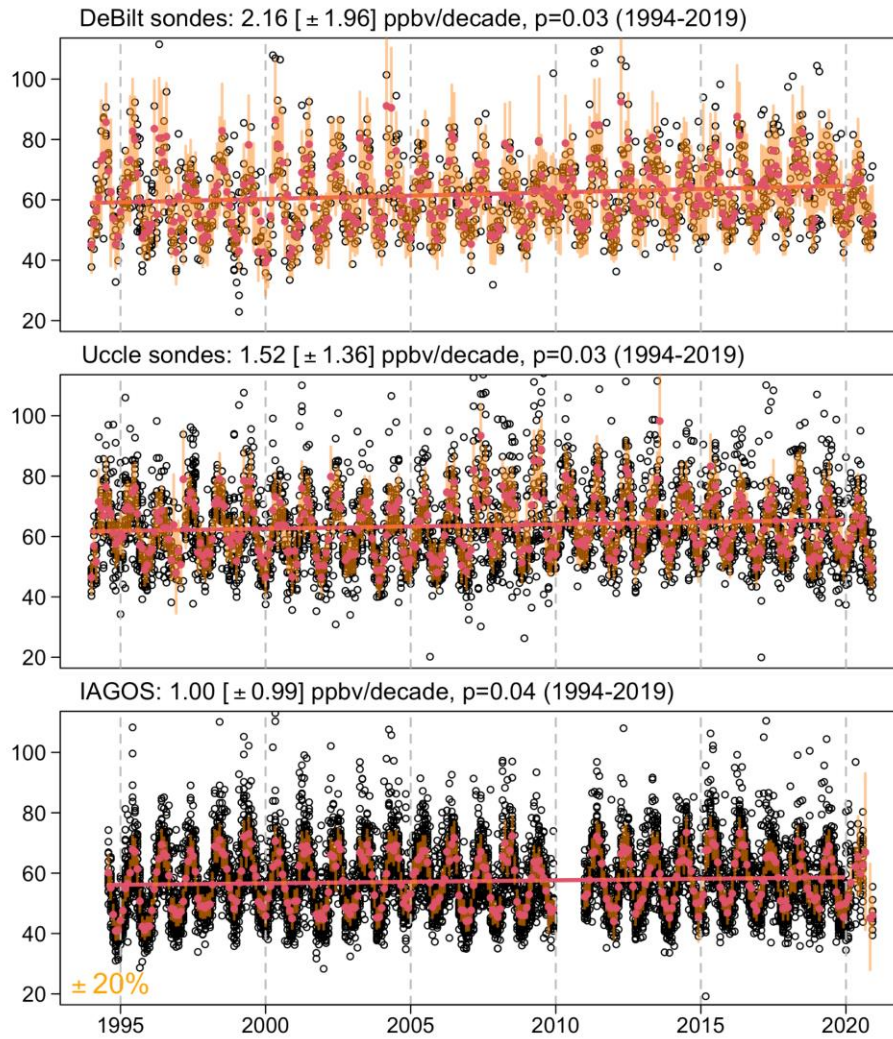

281

282 **Figure S6c.** As in Figure S6b but with 20% random noise imposed on each individual ozone  
 283 value.

284

285

286

287

288

289

290

291

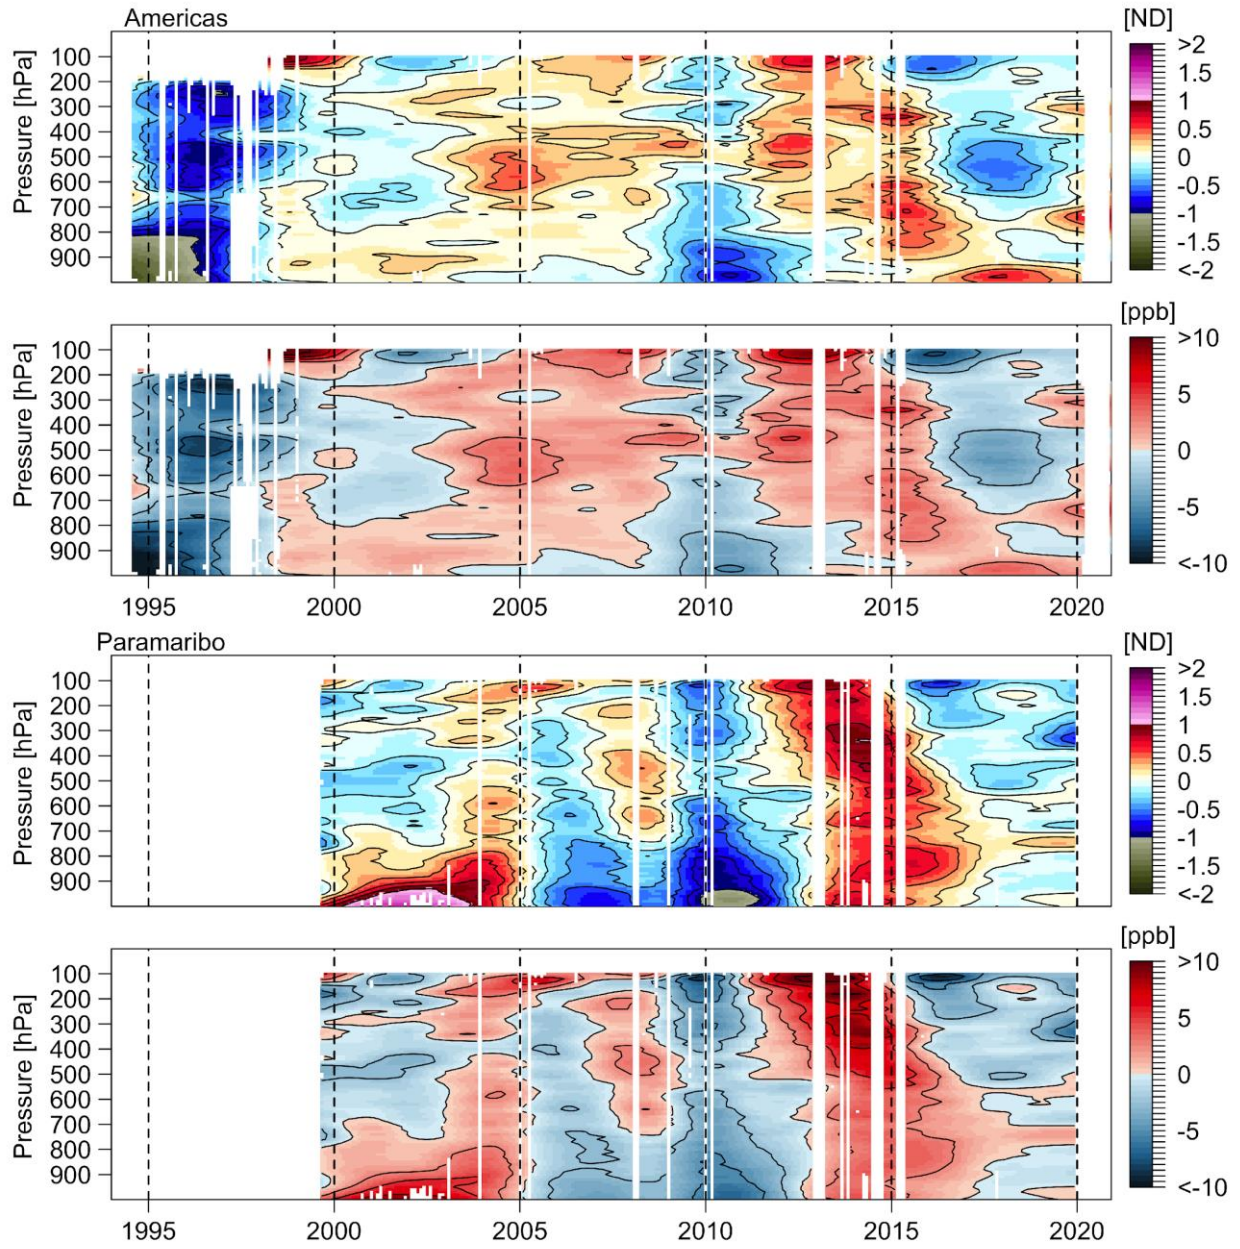



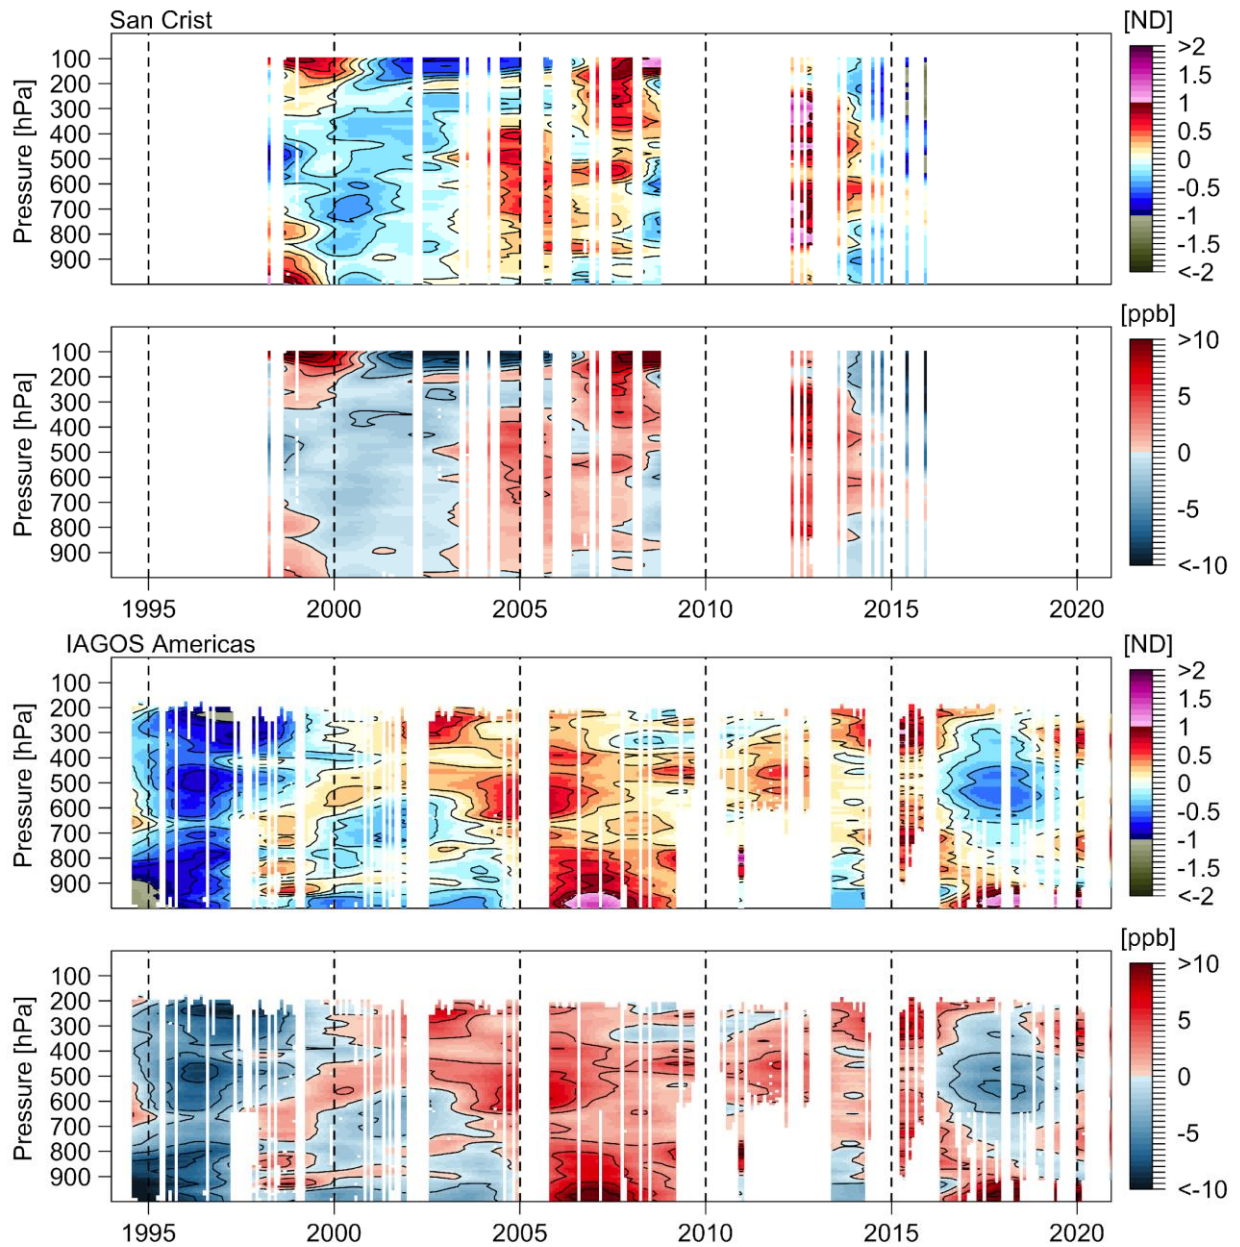

292

293 **Figure S7.** Ozone mean distributions above Americas based on normalized deviation. Panels  
 294 show the results of the fused data set from IAGOS and SHADOZ (top), and for the SHADOZ  
 295 individual sites (Paramaribo and San Cristobal) and IAGOS region (Americas).

296

297

298

299

300

301

302

303

304

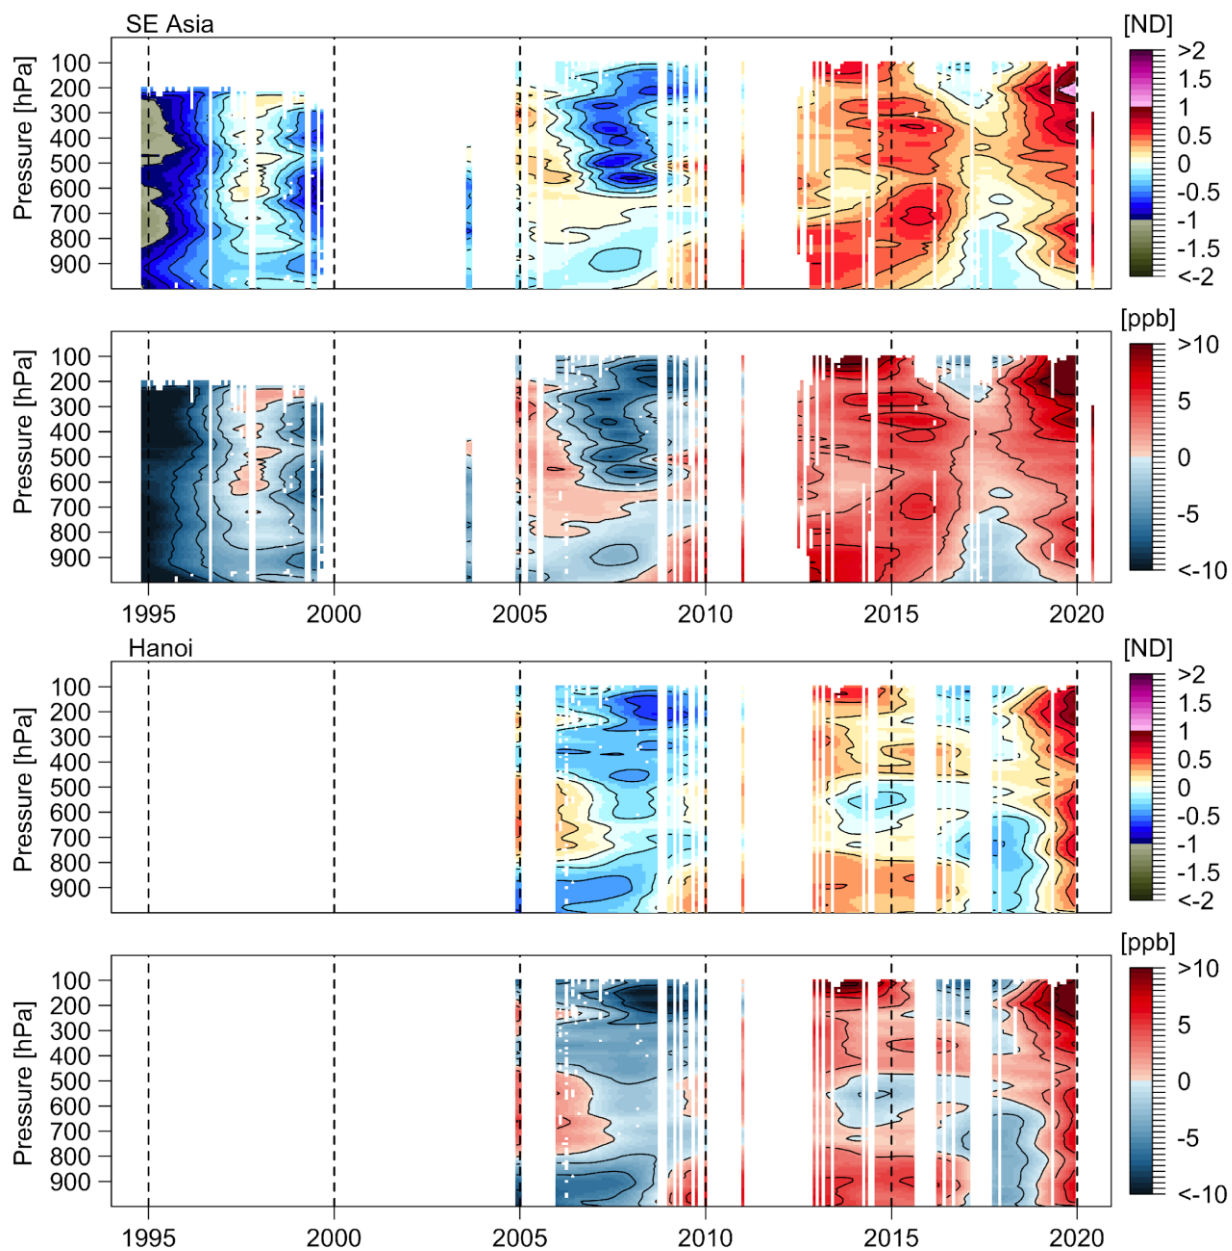

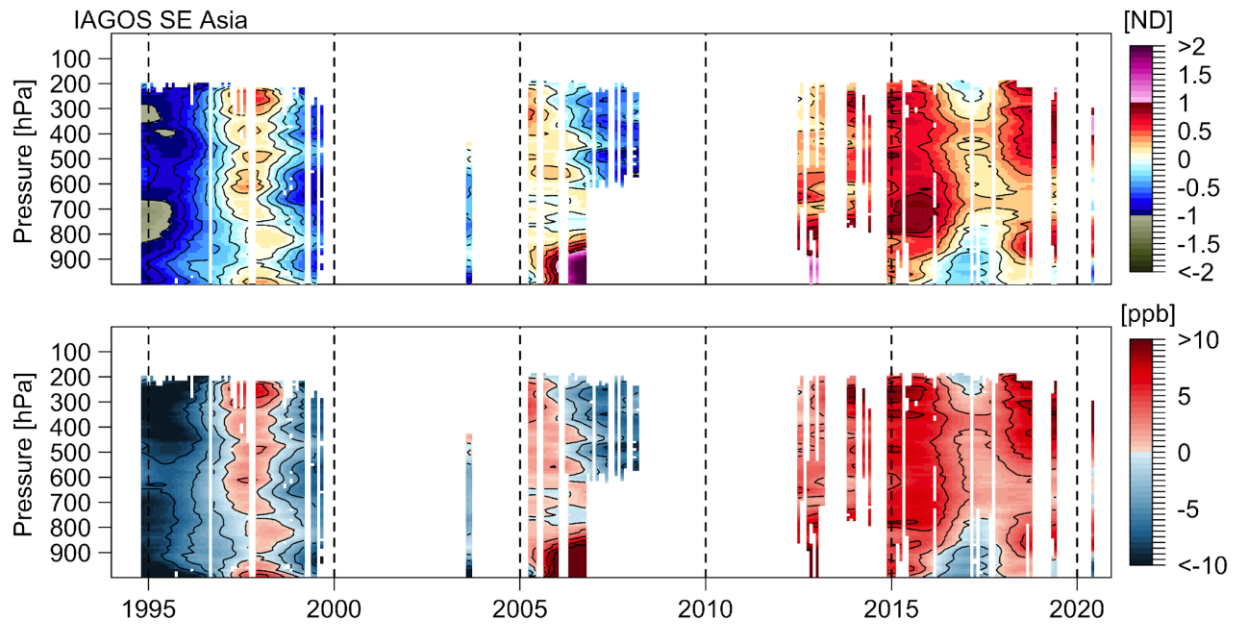

305

306 **Figure S8.** Same as Figure S7 but above Southeast Asia. The SHADOZ individual site used for  
 307 the fused data is Hanoi.

308

309

310

311

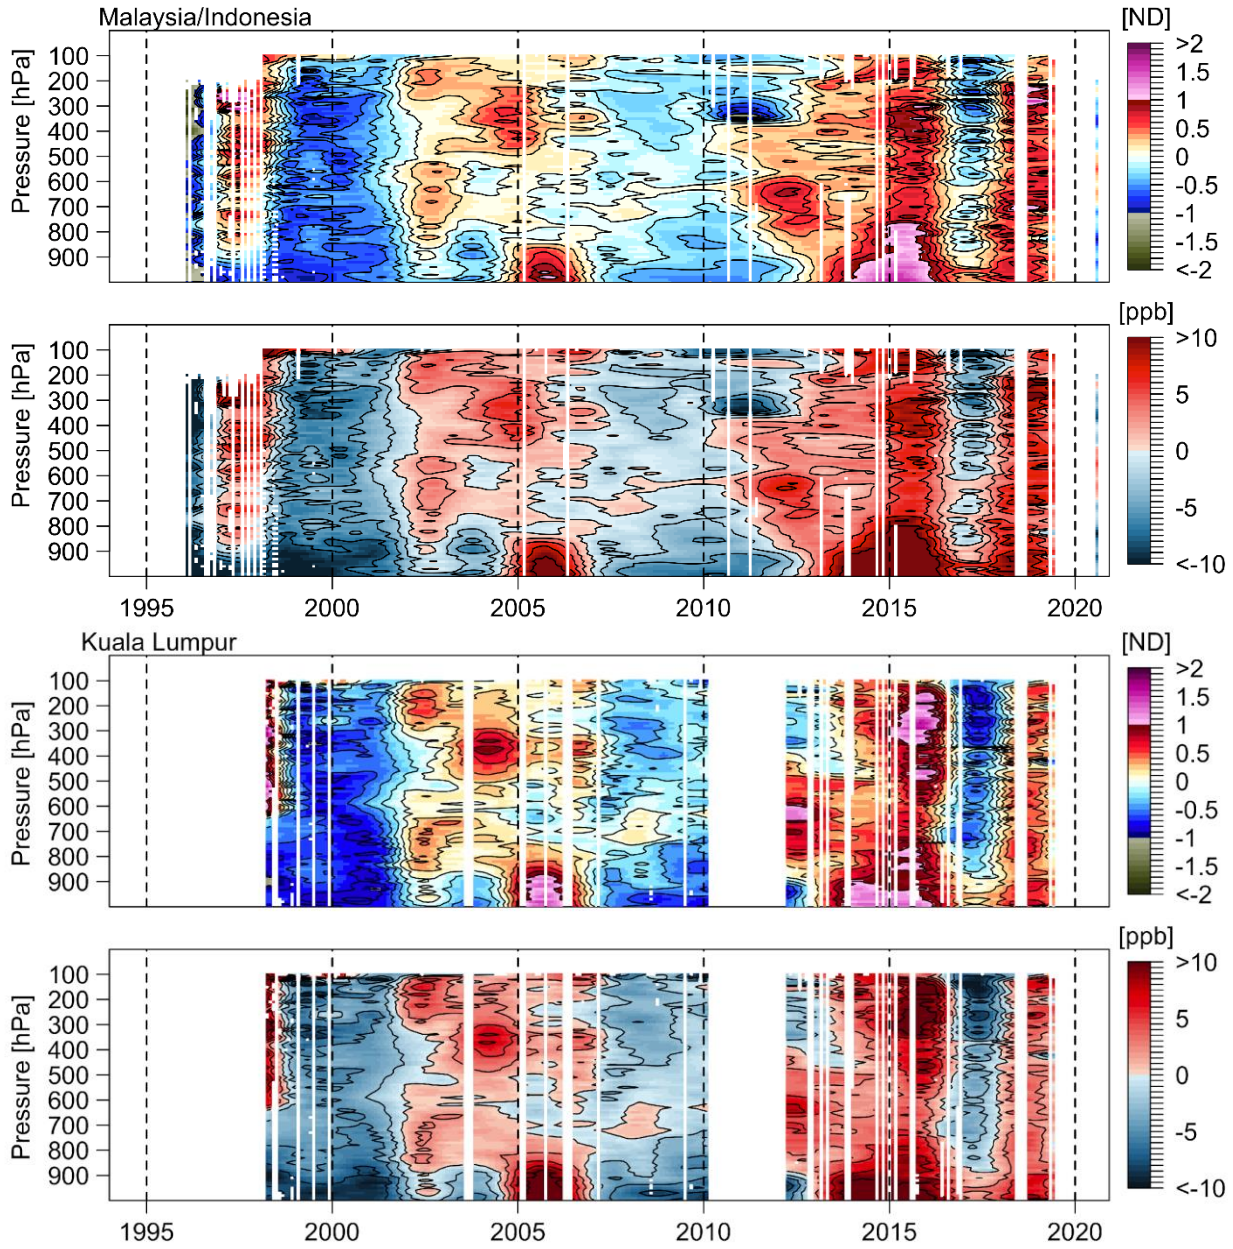

312

313



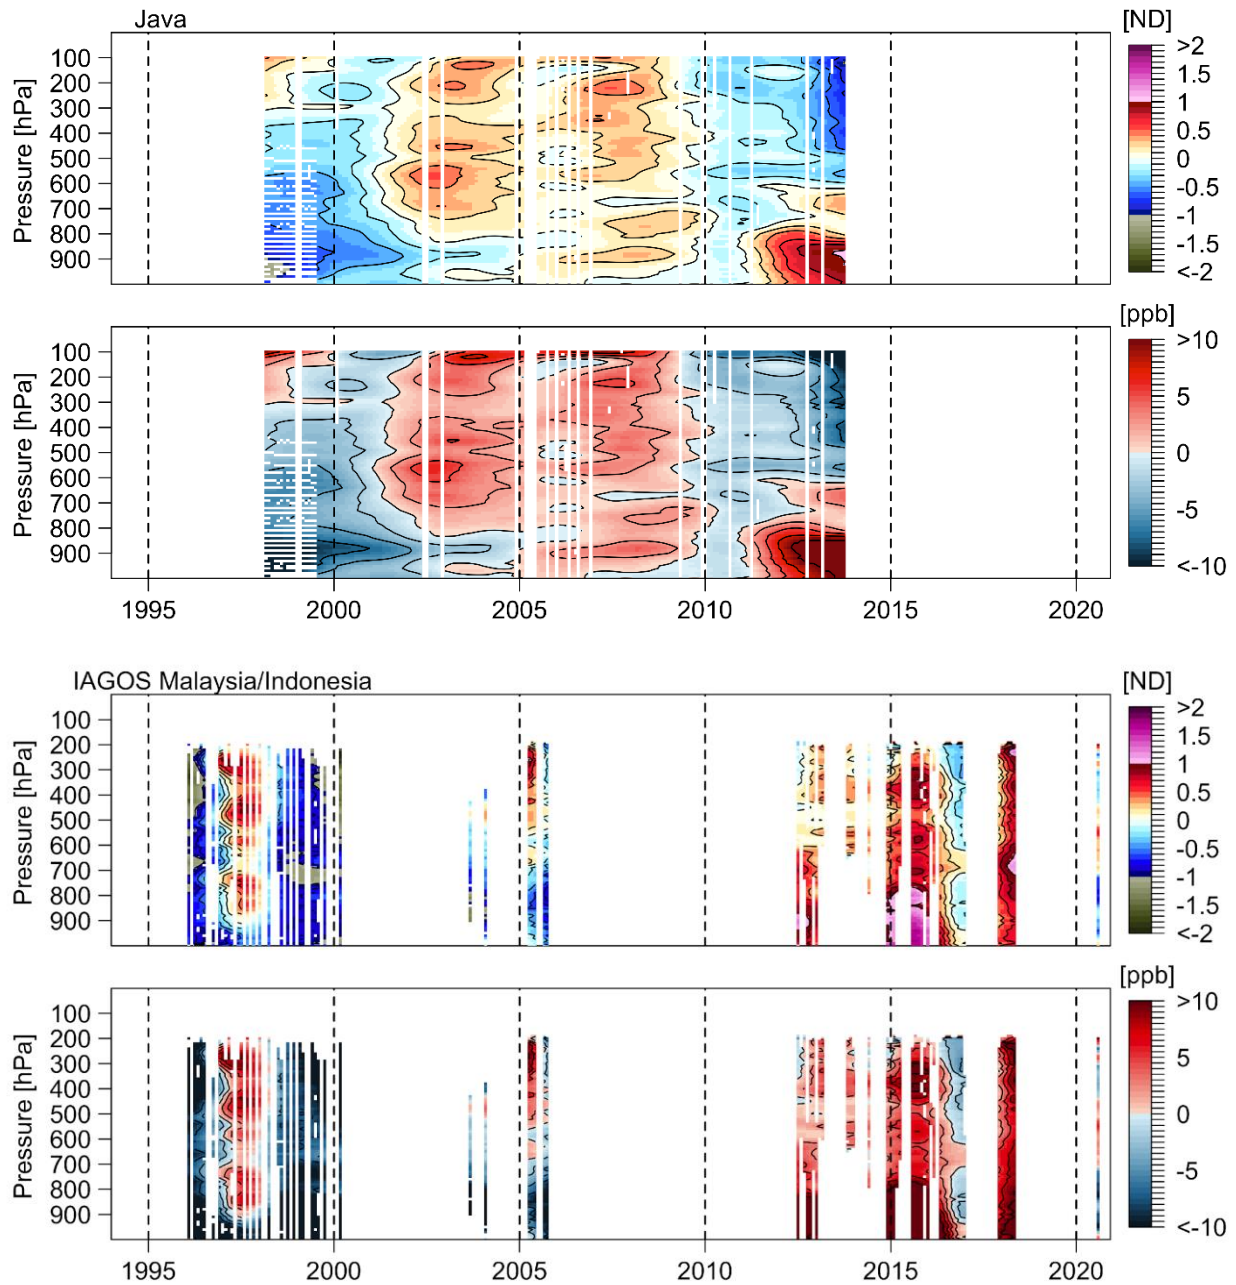

314  
315

316  
317  
318  
319  
320  
321

**Figure S9.** Same as Figure S7 but above Malaysia/Indonesia. The SHADOZ individual site used for the fused data is Kuala Lumpur and Watukosek (Java).



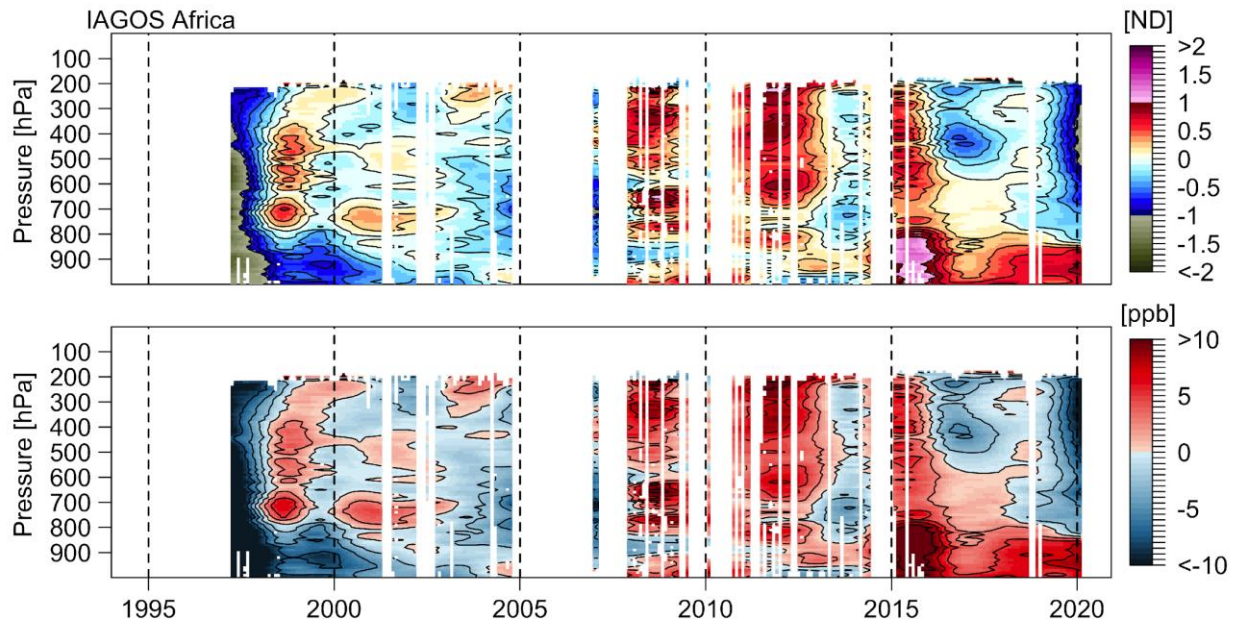

322  
 323 **Figure S10.** Same as Figure S7 but above western Africa. There are no SHADOZ data available  
 324 in this region. We use only IAGOS data.

325

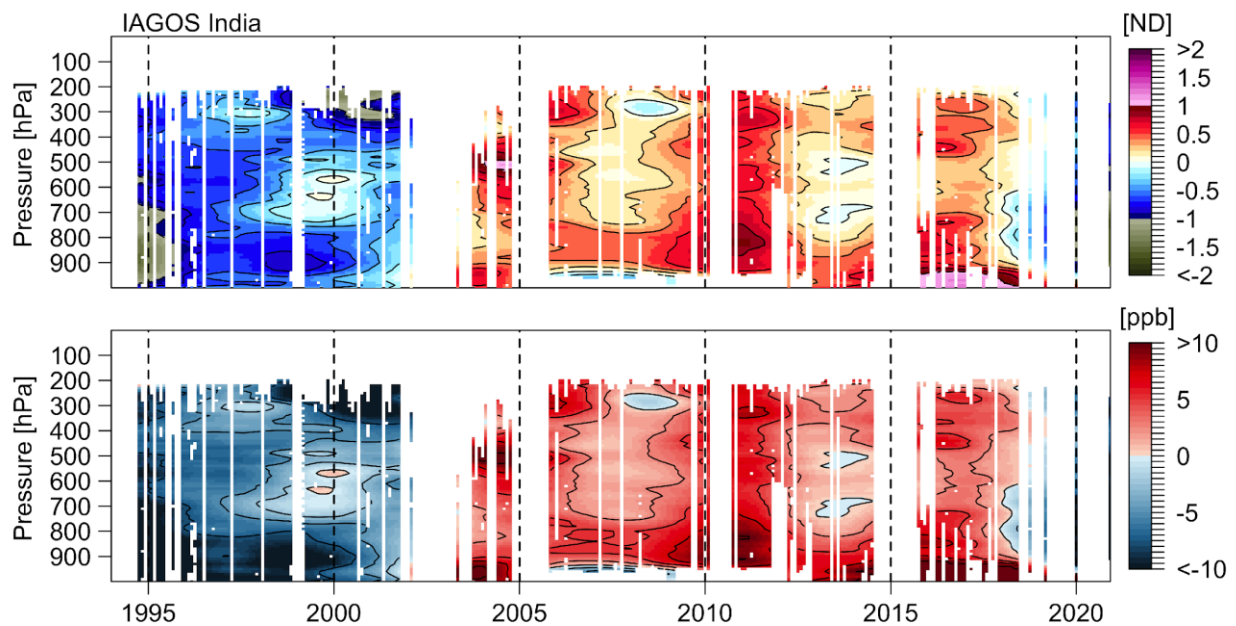

326  
 327 **Figure S11.** Same as Figure S7 but above India. There are no SHADOZ data available in this  
 328 region. We use only IAGOS data.

329

## Median trend distributions (IAGOS)

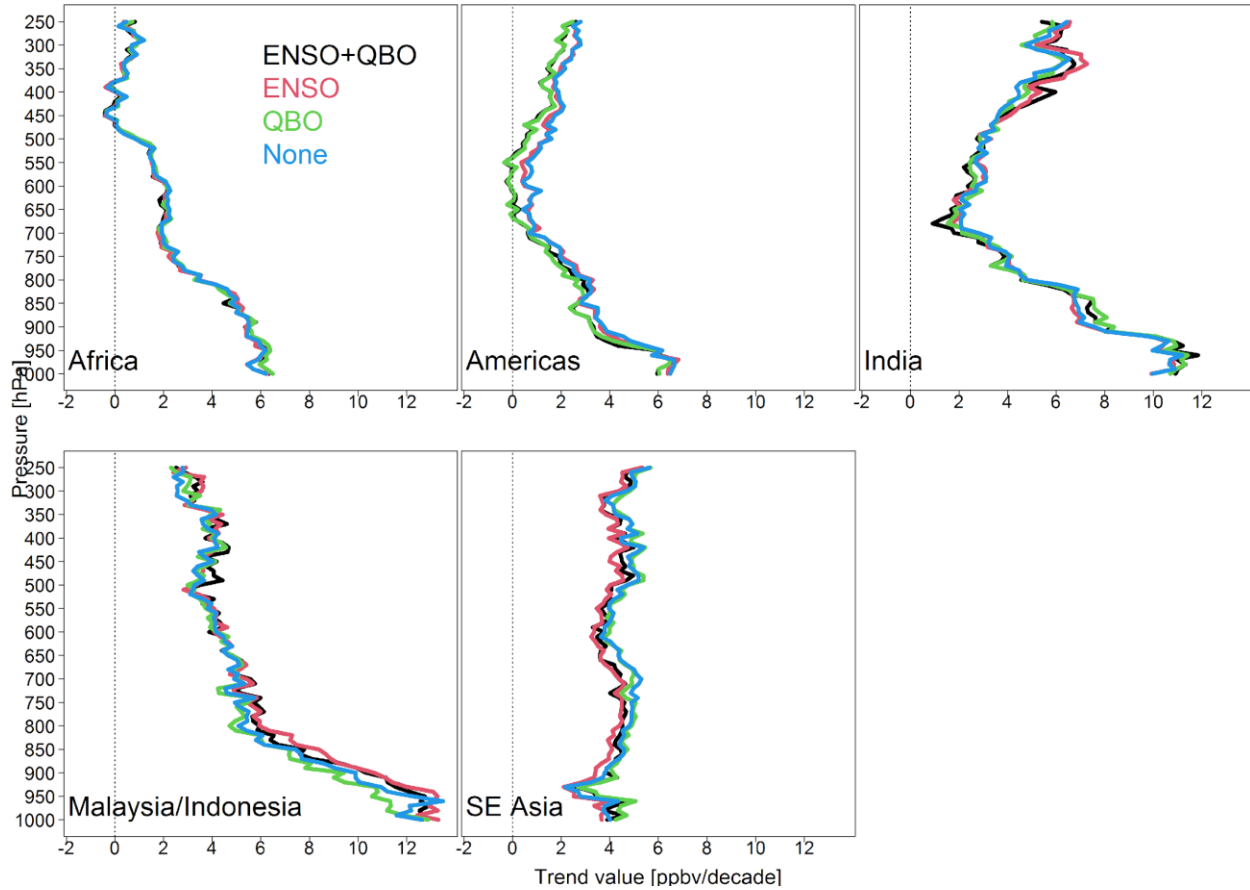

330

331 **Figure S12.** Vertical profiles of ozone trends (nmol mol<sup>-1</sup>/decade) from a linear regression that  
332 considers climate variability such as ENSO (El Niño-Southern Oscillation) and QBO (quasi-  
333 biennial oscillation). The trends are reported over the five IAGOS regions: Africa, Americas,  
334 India, Malaysia/Indonesia and Southeast Asia.

335

336



**Annual bias of satellite TCO when compared with the 3 in-situ datasets**

▲ IAGOS   ▼ ATom   ● SHADOZ

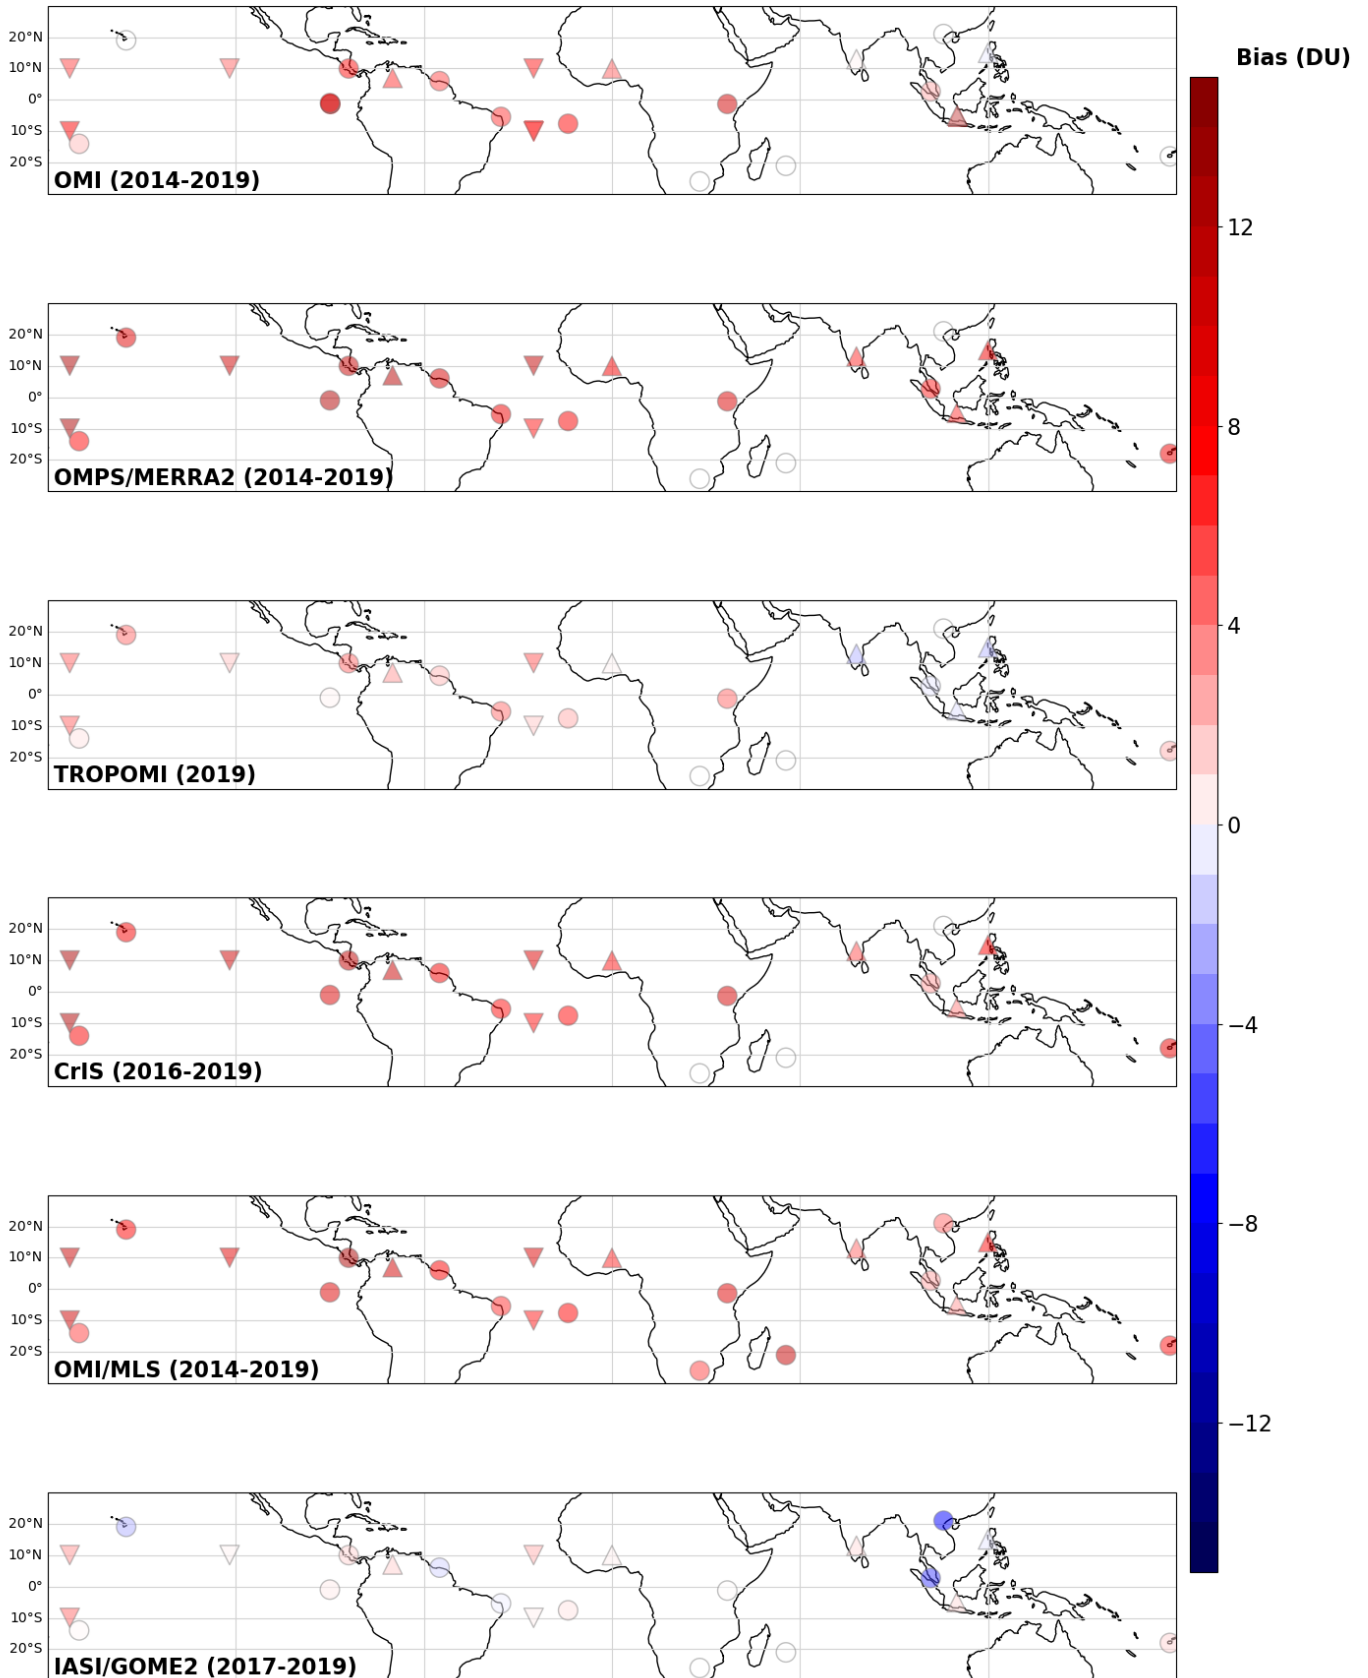

339 **Figure S13.** Absolute annual mean biases of tropical tropospheric column ozone (TTCO in DU)  
 340 of the six satellite products: OMI (2014-2019), OMPS/MERRA2 (2014-2019), TROPOMI  
 341 (2019), CrIS (2018-2019), OMI/MLS (2014-2019) and IASI/GOME2 (2017-2019) against the  
 342 three in situ TTCO up to 270 hPa: IAGOS (2014-2019), SHADOZ (2014-2019) and ATom  
 343 (2016-2018).

344  
 345  
 346

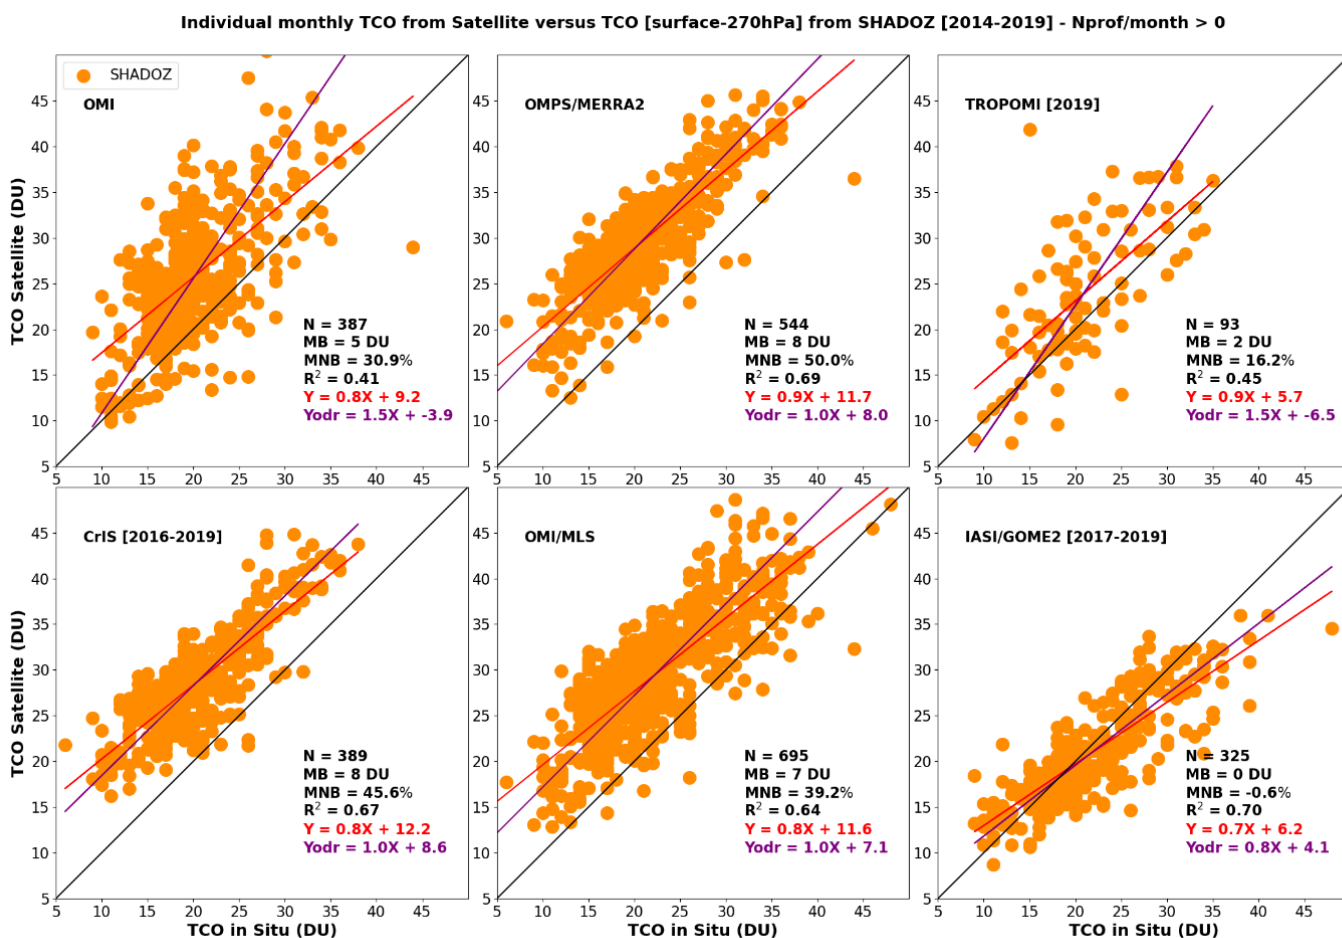

347  
 348  
 349  
 350  
 351

**Figure S14.** Similar to Figure 5 but the in situ TTCO is derived from integrating the column up to 270 hPa instead of 100 hPa.

### Annual bias of satellite TCO when compared with SHADOZ 150 hPa [2014-2019]

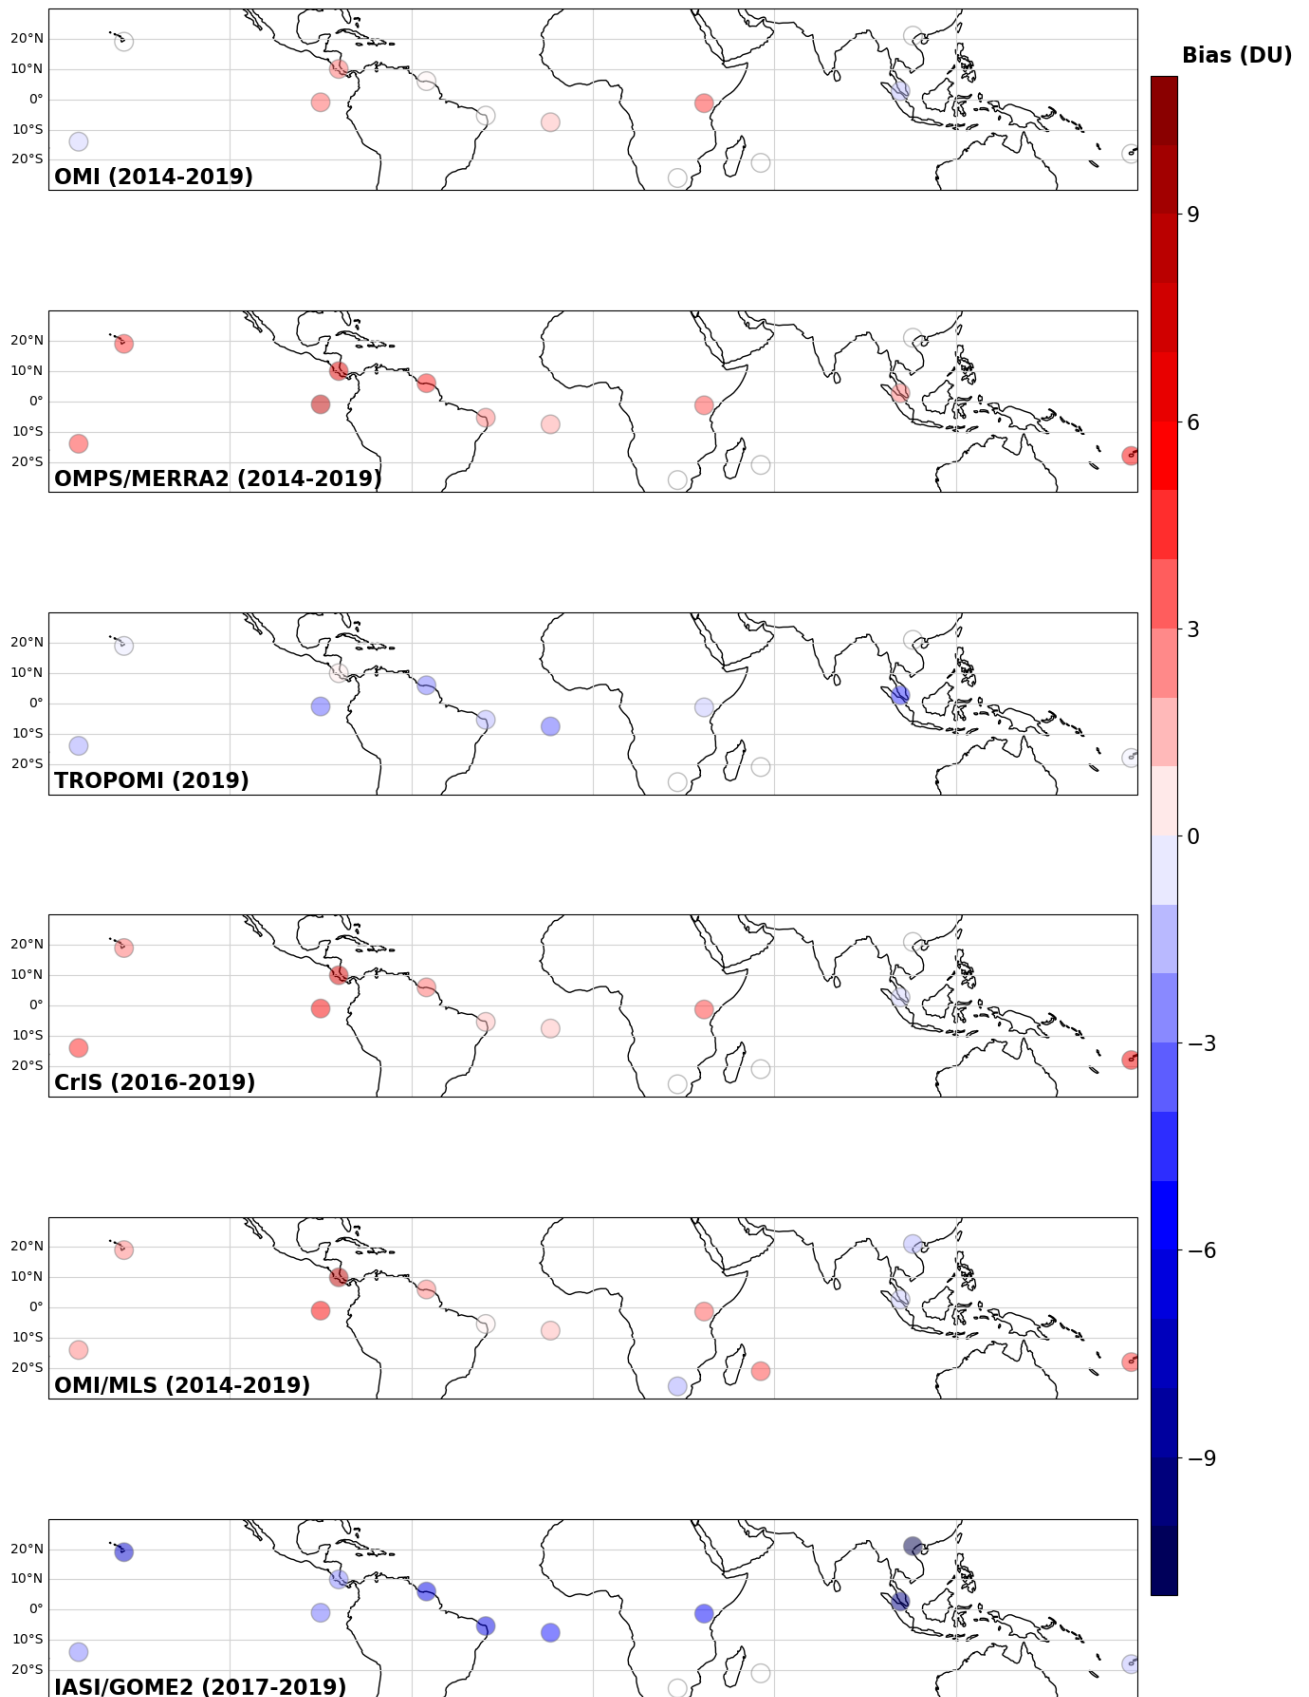

353 **Figure S15.** Same as Figure S13 but against SHADOZ only (TTCO up to 150 hPa).

354

355

356

357

358

### 2-Sigma for 50th percentile ozone trends [1994-2019]

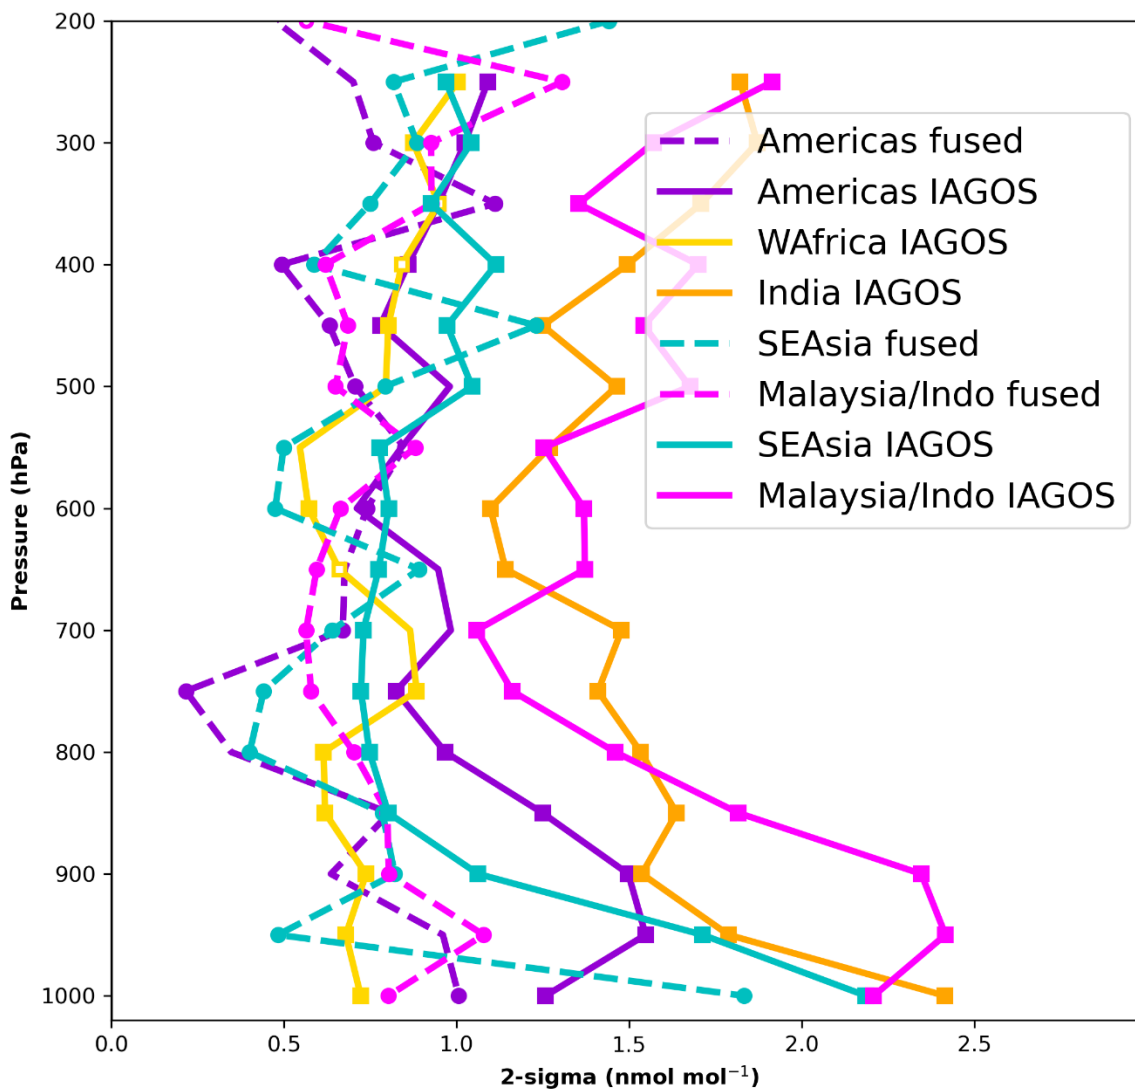

360 **Figure S16.** Vertical profiles of the 2-sigma that characterize ozone trends ( $\text{nmol mol}^{-1}$  which is  
 361 equivalent to  $\text{nmol mol}^{-1}$ ) between 1994 and 2019 with 50 hPa resolution. The 2-sigma metric is  
 362 calculated for the 5 IAGOS regions in the tropics:  
 363 Americas, Malaysia/Indonesia, Western Africa, India, Southeast Asia. We assessed the 2-sigma  
 364 associated to IAGOS trends (squares) and the fused trends (IAGOS + SHADOZ, circles) in the 3  
 365 regions where SHADOZ data are available.  
 366

367

368

369

370



371

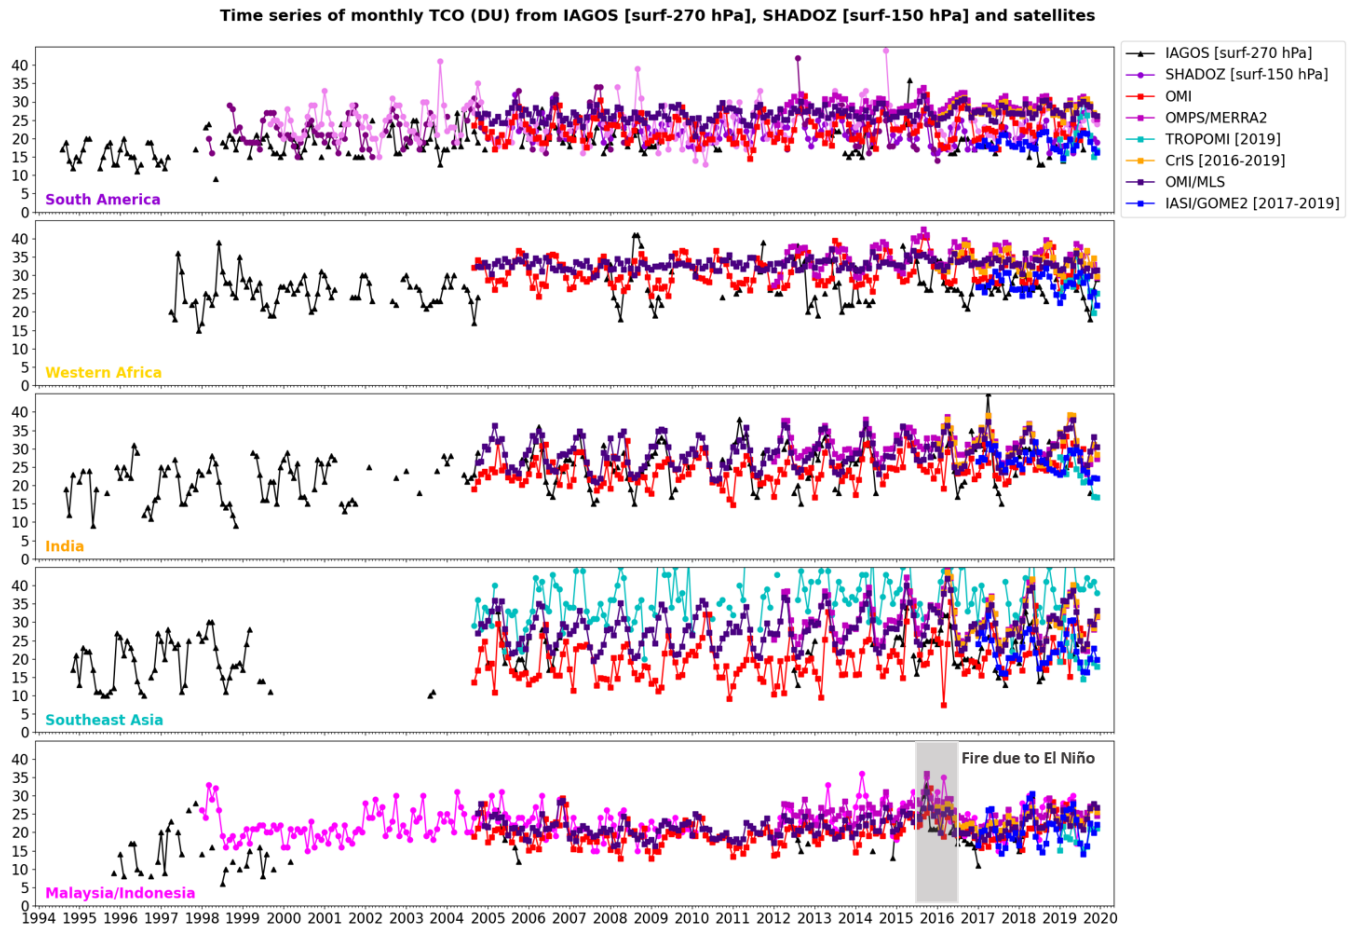

372

373 **Figure S17.** Time series of the monthly tropical tropospheric column ozone (TTCO) from  
374 IAGOS ozone profiles (TTCO: surface-270 hPa, black line with triangle markers), from  
375 SHADOZ ozone profiles (TTCO: surface-150hPa, colored lines with circle markers), and  
376 satellite data (colored line with square markers) extracted above the IAGOS regions. These  
377 monthly columns are not used to assess the trends reported in Table 1.

378

379



# GFED4 Bb CO –monthly

monthly (1997–2018)

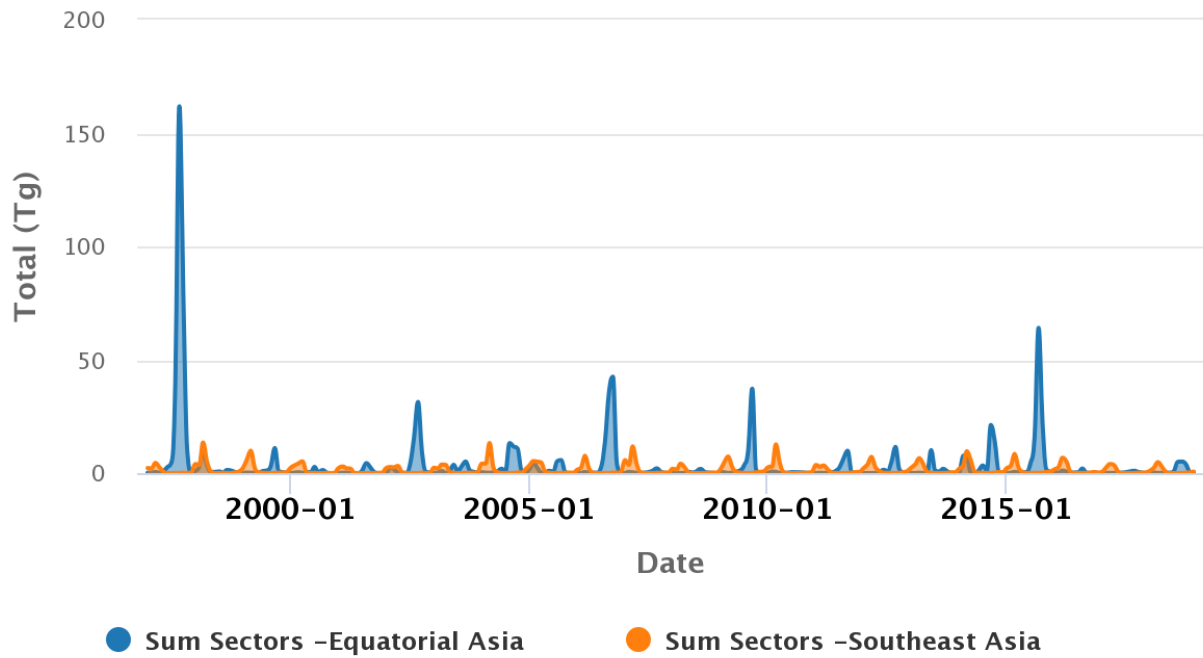

381

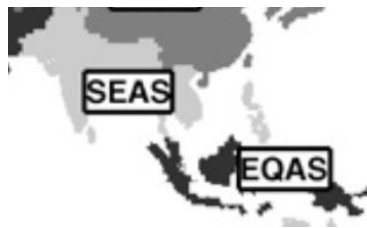

382

383 **Figure S18.** Time series of monthly emissions of CO in Tg due to biomass burning over two  
384 GFED source regions: Equatorial Asia (EQAS) and Southeast Asia (SEAS). *Source: ECCAD*  
385 (<https://eccad.aeris-data.fr/>)

386

387

388

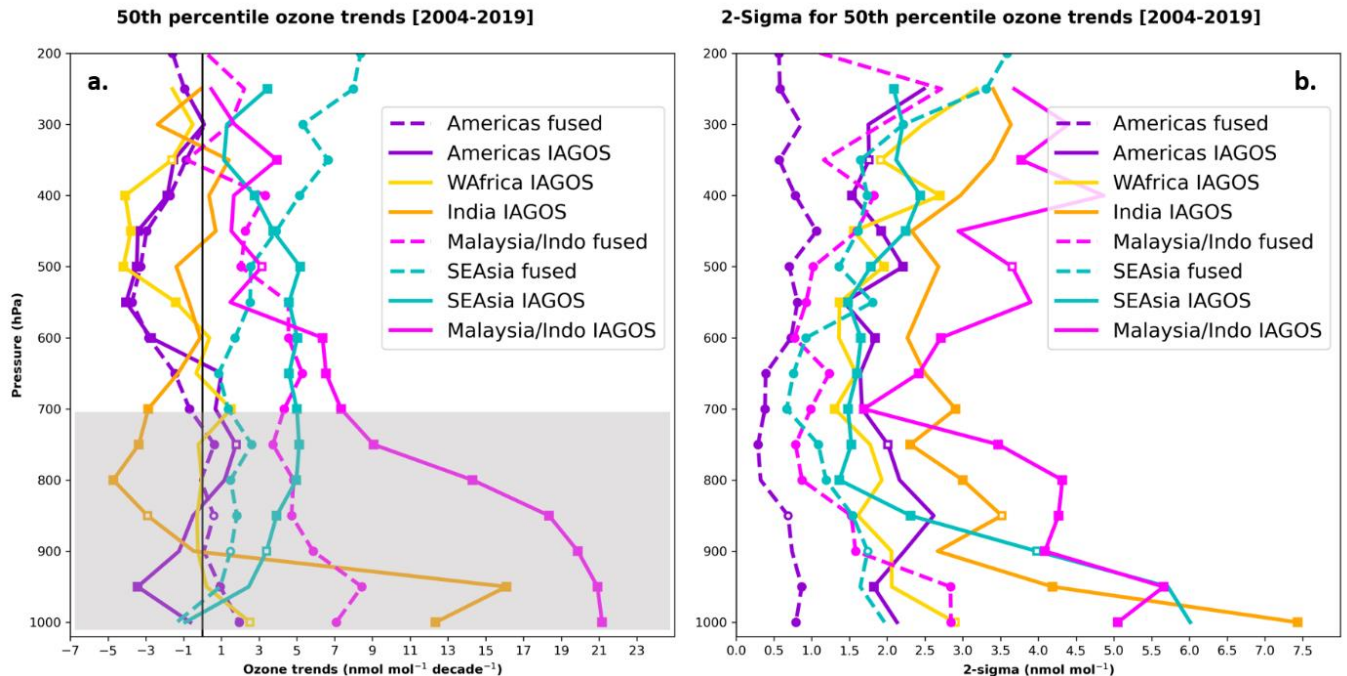

389 **Figures S19.** Vertical profiles of ozone trends (nmol mol<sup>-1</sup> decade<sup>-1</sup>) (panel a.) and the associated  
 390 uncertainties (2-sigma, panel b.) between 2004 and 2019 with 50 hPa resolution. Trends are  
 391 calculated for the 5 IAGOS regions in the tropics:  
 392 Americas, Western Africa, India, Southeast Asia and Malaysia/Indonesia. SHADOZ data are  
 393 available for 3 out of the 5 IAGOS regions and fused trends (IAGOS + SHADOZ) were  
 394 assessed.  
 395 Squares (IAGOS trends) or circles (fused trends) indicate trends with *p* values less than 0.05.  
 396 Open squares or circles indicate trends with *p* values between 0.05 and 0.1. The zero-trend value  
 397 is indicated with a vertical black bar. The vertical range below 700 hPa is colored in grey to  
 398 indicate that the fused trends are based on several sites and airports influenced by different local  
 399 air masses.  
 400

401

402

403

Decadal ozone trends for 2004-2019, based on the annual ozone anomaly relative to 2004-2019  
 during months: 1 2 3 4 5 6 7 8 9 10 11 12

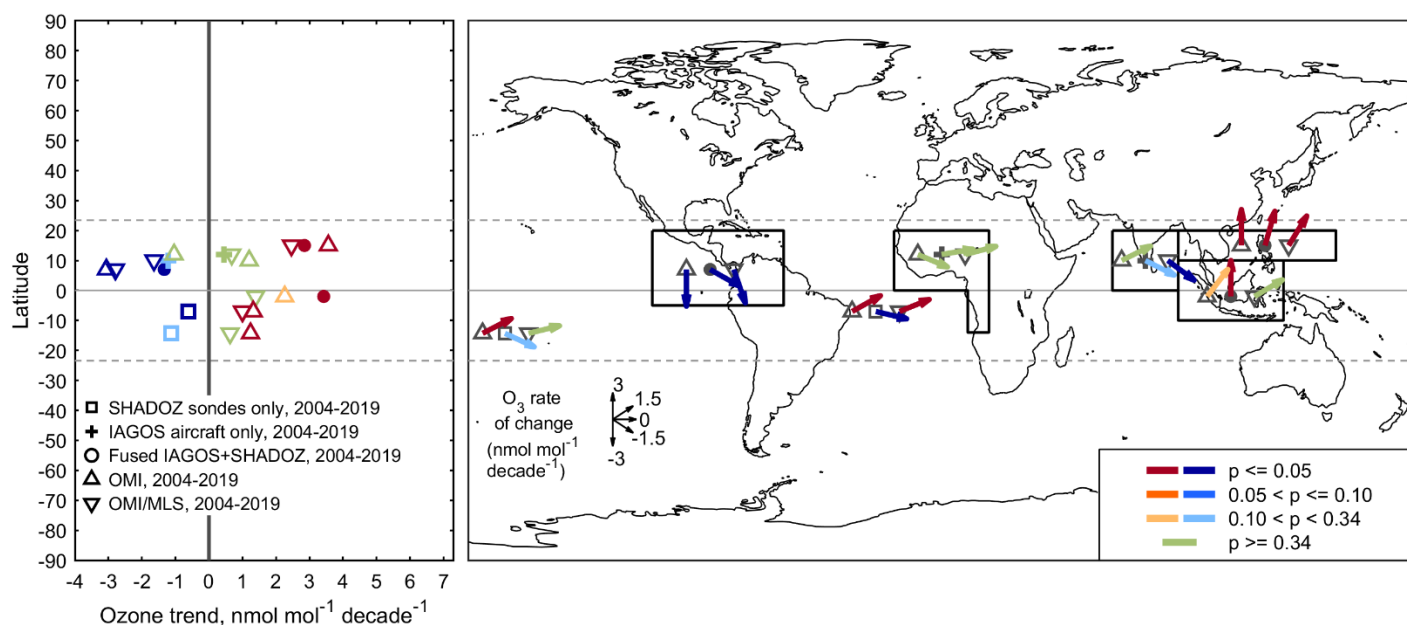

404

405 **Figure S20.** As in Figure 7 but the satellite sample sizes have been greatly reduced so that they  
 406 only coincide with the specific months and grid-cells sampled by the IAGOS aircraft. Trends of  
 407 tropical tropospheric column ozone (TTCO) in  $\text{nmol mol}^{-1} \text{decade}^{-1}$  between 2004 and 2019 from  
 408 IAGOS (crosses), SHADOZ (squares), IAGOS fused with SHADOZ (circles), OMI (triangles  
 409 up) and OMI/MLS (triangles down) above the five continental IAGOS regions (Americas,  
 410 Africa, India, Southeast Asia and Malaysia/Indonesia) and two oceanic SHADOZ regions  
 411 (Samoa and Natal + Ascension Island). The left panel shows the trends of ozone as a function of  
 412 latitude. The right panel shows the trends of ozone on the map with the black rectangles  
 413 demarcating the five IAGOS regions. On the map, the longitude of the crosses, circles, triangles  
 414 and squares are arbitrary and the latitude is the mean latitude of the black rectangles or relative to  
 415 the SHADOZ sites. The direction of the arrows shows the magnitude of the trends and the colors  
 416 indicate the  $p$ -value. The TTCO trends from in situ data are calculated from the monthly TTCO  
 417 between the surface and 100 hPa, except over India where IAGOS profiles are available between  
 418 the surface and around 200 hPa. The TTCO trends from OMI and OMI/MLS are calculated from  
 419 the monthly TTCO defined between the surface and around 102-105 hPa (Figure S1).

420  
 421  
 422  
 423  
 424  
 425  
 426  
 427  
 428

429

430
